## 1 **Title: Single-cell profiling identifies a spectrum of human unconventional** 2 **intraepithelial T lineage cells**

3  
4 **Authors:** Lore Billiet<sup>1†</sup>, Laurenz De Cock<sup>2,3†</sup>, Guillem Sanchez Sanchez<sup>4,5,6</sup>, Rupert L.  
5 Mayer<sup>2,7,8</sup>, Glenn Goetgeluk<sup>1,3</sup>, Stijn De Munter<sup>1,3</sup>, Melissa Pille<sup>1</sup>, Joline Ingels<sup>1,3</sup>, Hanne  
6 Jansen<sup>1</sup>, Karin Weening<sup>1</sup>, Eva Pascal<sup>1,3</sup>, Killian Raes<sup>1</sup>, Sarah Bonte<sup>3,9,11</sup>, Tessa Kerre<sup>1,3,9</sup>, Niels  
7 Vandamme<sup>10,11</sup>, Ruth Seurinck<sup>11</sup>, Jana Roels<sup>10,11</sup>, Marieke Lavaert<sup>1</sup>, Filip Van Nieuwerburgh<sup>3,12</sup>,  
8 Georges Leclercq<sup>1,3</sup>, Tom Taghon<sup>1,3</sup>, Francis Impens<sup>2,7,8</sup>, Björn Menten<sup>2</sup>, David Vermijlen<sup>4,5,6</sup>  
9 and Bart Vandekerckhove<sup>1,3\*</sup>

### 10 **Affiliations:**

11 <sup>1</sup>Department of Diagnostic Sciences, Ghent University, Ghent, Belgium.

12 <sup>2</sup>Department of Biomolecular Medicine, Ghent University, Ghent, Belgium.

13 <sup>3</sup>Cancer Research Institute Ghent (CRIG), Ghent, Belgium.

14 <sup>4</sup>Department of Pharmacotherapy and Pharmaceutics, Université Libre de Bruxelles (ULB),  
15 Brussels, Belgium.

16 <sup>5</sup>Institute for Medical Immunology, Université Libre de Bruxelles (ULB), Brussels, Belgium.

17 <sup>6</sup>ULB Center for Research in Immunology (U-CRI), Université Libre de Bruxelles (ULB),  
18 Brussels, Belgium.

19 <sup>7</sup>VIB-UGent Center for Medical Biotechnology, VIB, Ghent, Belgium.

20 <sup>8</sup>VIB Proteomics Core, VIB, Ghent, Belgium.

21 <sup>9</sup>Department of Internal Medicine and Pediatrics, Ghent University, Ghent, Belgium.

22 <sup>10</sup>VIB Single Cell Core, VIB, Ghent, Belgium.

23 <sup>11</sup>Data Mining and Modeling for Biomedicine, VIB-UGent Center for Inflammation Research,  
24 Ghent, Belgium

25 <sup>12</sup>Department of Pharmaceutics, Ghent University, Ghent, Belgium

26 <sup>†</sup>These authors contributed equally to this work

27 <sup>\*</sup>Corresponding author. email: bart.vandekerckhove@ugent.be

28 **Summary:** Billiet et al. identify the postthymic progeny of the intraepithelial lymphocyte  
29 precursors in human based on shared characteristics of the T cell receptor repertoire and the  
30 transcriptome. This lineage represents a well-defined but heterogeneous, unconventional TCR $\alpha\beta^+$   
31 lineage mostly confined within the CD8 single positive T cells.

32 **Abstract:** In the human thymus, a CD10<sup>+</sup> PD-1<sup>+</sup> TCR $\alpha\beta^+$  differentiation pathway diverges from  
33 the conventional single positive T cell lineages at the early double positive stage. These cells are  
34 phenotypically and functionally similar to murine unconventional intraepithelial lymphocyte  
35 (uIEL) precursors. Here, the progeny of the human uIEL lineage was identified in antigen-  
36 inexperienced blood. The uIELs in thymus and peripheral blood share a transcriptomic profile,  
37 characterized by hallmark transcription factors (i.e. *ZNF683* and *IKZF2*), and polyclonal TCR  
38 repertoire with autoreactive features, exhibiting a bias towards early TCR alpha chain

39 rearrangements. Single-cell RNA sequencing confirmed a common developmental trajectory  
40 between the thymic and peripheral uIELs, and clearly delineated this unconventional lineage in  
41 peripheral blood. This population is phenotypically defined as CD3<sup>+</sup> TCRαβ<sup>+</sup> CD4<sup>-</sup> CCR7<sup>-</sup> CD26<sup>-</sup>  
42 . It contains CD10<sup>+</sup> recent thymic emigrants, Helios<sup>+</sup> KIR<sup>+</sup> CD8<sup>+</sup> Tregs and CD8αα<sup>+</sup> T cells. Thus,  
43 the uIEL lineage represents a well-defined but heterogeneous, unconventional TCRαβ<sup>+</sup> lineage  
44 mostly confined in human within the CD8 single positive T cells.

## 45 INTRODUCTION

46 After successful rearrangement of the T cell receptor (TCR) alpha and beta locus in the thymus,  
47 each precursor T cell expresses a single, unique TCR. These cells are subsequently selected for  
48 major histocompatibility complex (MHC) binding affinity and only the cells with a moderate  
49 binding affinity further differentiate to mature CD4 or CD8 single positive (SP) conventional T  
50 cells (CTCs), a process called positive selection. Conventional T cells leave the thymus as  
51 dormant, stem cell-like cells without effector function. These cells will acquire effector function  
52 only after encountering their cognate foreign antigen. Concurrently, several minor lineages of so-  
53 called unconventional T cell populations are generated by different selection mechanisms.  
54 Immature thymocytes may receive a strong TCR signal, resulting in agonist selection. These T  
55 cells leave the thymus in an activated state, thereby facilitating rapid expansion in the tissues.  
56 Mucosal-associated invariant T (MAIT) and natural killer T (NKT) cells are two unconventional  
57 populations that express a semi-invariant TCRαβ reactive to microbial compounds. Besides these  
58 two oligoclonal UTC populations, an agonist-selected, polyclonal intraepithelial lymphocyte (IEL)  
59 lineage has been described <sup>1,2</sup>.

60 CD8αα IELs form a prominent thymus-derived T cell population that guards the gut epithelium,  
61 in addition to conventional memory T cells <sup>3</sup>. Their development has been predominantly studied  
62 in mice, where it was shown that thymic IEL precursors (IELps) diverge from the conventional T  
63 cell lineage upon high-affinity TCR interaction at the CD4<sup>+</sup> CD8<sup>+</sup> double positive (DP) stage.  
64 These precursor T cells are induced to differentiate into CD4<sup>-</sup> CD8<sup>-</sup> double negative (DN) T cells  
65 that express gut homing receptors <sup>4-6</sup>. IELp TCRs were shown to exhibit broad reactivity against  
66 multiple MHC haplotypes and across MHC classes and therefore may be more generally  
67 deployable compared to CTCs that have a narrow antigen specificity <sup>7</sup>. It has been reported in mice  
68 that IELps progress through a PD-1<sup>+</sup> stage before upregulating T-bet, a process that is regulated  
69 by the transcription factors (TFs) *ID2*, *ID3* and *IKZF2* (Helios)<sup>8</sup>. These IELs may play a role in  
70 homeostasis by potentiating innate immune responses and/or by directly killing autologous  
71 infected cells. However, their mode of action currently remains enigmatic. It is currently not  
72 known whether CD8αα IELs present in other tissues or cancer micro-environments are all derived  
73 from the same agonist-selected T cell lineage <sup>9,10</sup>.

74 CD8αα<sup>+</sup> CD8β<sup>-</sup> IELs are not present in the human gut, suggesting that there may not be a human  
75 equivalent for the murine CD8αα IEL lineage <sup>11</sup>. However, it is possible that the human IELs have  
76 a different phenotype compared to their murine counterparts. Our research previously described  
77 the likely IELps in human postnatal thymus (PNT) that is similar to the murine thymic precursors  
78 of the CD8αα<sup>+</sup> IEL lineage. These human IELps present in the thymus with a CD10<sup>+</sup> PD-1<sup>+</sup>  
79 phenotype and, unlike in mice, express both CD8αα and CD8αβ dimers <sup>12</sup>. Similar to murine  
80 IELps, these cells can be generated *in vitro* by agonist stimulation of DP thymocytes, have a  
81 characteristic TCR repertoire different from CTCs, express TCRs with characteristics of  
82 autoreactivity and are activated in the thymus by high affinity ligands as evidenced by the  
83 expression of PD-1 and Helios <sup>12-14</sup>. The existence of this lineage in the human thymus as well as

84 the early divergence from the conventional T cell lineage was recently confirmed via single-cell  
85 mapping<sup>15,16</sup>. It is currently unknown whether these human IELps leave the thymus and, if so,  
86 which phenotype and function these cells have.

87 The aim of this study is to identify the progeny of the IELp lineage in the human periphery. Within  
88 peripheral blood, the focus was on cord blood (CB) as CB CTCs have not yet been activated by  
89 foreign antigens and therefore, are easily discriminated from activated unconventional T cells.  
90 Therefore, the PNT IELp population and their likely progeny in CB were comprehensively  
91 analyzed by means of transcriptome, TCR and proteome analyses. A single-cell RNA sequencing  
92 (scRNA-seq) analysis was performed to further unravel the progeny in CB, combined with CITE-  
93 sequencing to establish a phenotypic definition encompassing the entire heterogeneous population.  
94 In summary, a detailed picture of the unconventional IEL (uIEL) lineage cells is provided in CB,  
95 which may lead to a better understanding of these cells in autoimmunity as well as immune  
96 reactivity to pathogens and will facilitate the study of the uIEL lineage in human.

## 97 RESULTS

### 98 The PNT and CB PD-1<sup>+</sup> population share a similar transcriptomic and proteomic profile

99 The phenotype of the IELps in human PNT was defined as CD3<sup>+</sup> TCRαβ<sup>+</sup> CD4<sup>-</sup> CD8α<sup>+</sup> CD10<sup>+</sup>  
100 PD-1<sup>+</sup> (fig. S1A). The progeny of the PNT IELp population in human CB was tentatively defined  
101 as CD3<sup>+/low</sup> TCRγδ<sup>-</sup> CD4<sup>-</sup> CD8α<sup>+</sup> PD-1<sup>+</sup> (fig. 1A)<sup>12</sup>. CD10 membrane expression, which is  
102 prominent on PNT PD-1<sup>+</sup> IELps (fig. S1A), was less prominent on the CB PD-1<sup>+</sup> population (fig.  
103 1B). However, *MME* mRNA (encoding CD10) was significantly upregulated in the CB PD-1<sup>+</sup>  
104 population compared to the conventional CD3<sup>+</sup> PD-1<sup>-</sup> population (fig. 1C). To examine the  
105 relatedness of PNT and CB PD-1<sup>+</sup> populations, both were comprehensively analyzed by means of  
106 transcriptome and proteome analyses and compared to the CD3<sup>+</sup> PD-1<sup>-</sup> population. Principle  
107 component analysis (PCA) of the sorted CB populations indicated that the PD-1<sup>+</sup> populations from  
108 the different donors clustered together and, similar to the respective PNT populations, shared more  
109 features with the unconventional TCRγδ population than with conventional PD-1<sup>-</sup> populations (fig.  
110 1D, S1C). Volcano plots comparing the transcriptomes of the PD1<sup>+</sup> and PD1<sup>-</sup> populations, showed  
111 significant upregulation in both CB and PNT PD-1<sup>+</sup> populations of the hallmark TFs *ZNF683*  
112 (Hobit), *IKZF2* (Helios), *RUNX3*, *ID3* and *TBX21* (T-bet), and downregulation of *RORA* and  
113 *FOXP1* that mediates quiescence, and of *SATB1* that is required for positive and negative selection  
114<sup>8,17,18</sup>. Notably, both CB and PNT PD-1<sup>+</sup> populations highly expressed the unconventional TCRαβ  
115 marker *TRGC2* (T Cell Receptor Gamma Constant 2), a gene progressively silenced in the  
116 conventional T cell lineage during passage through the CD4<sup>+</sup> CD8<sup>+</sup> DP stage in the thymus (fig.  
117 1C, S1B)<sup>19</sup>. Mass spectrometry-based proteomics confirmed upregulation of Helios in the PNT  
118 PD-1<sup>+</sup> population (fig. S1B) and, although not reaching the significance threshold, in CB (fig. 1C).  
119 Flow cytometric analysis validated the upregulation of Helios in both PNT and CB populations  
120 (fig. 1E, S1D). In search of additional distinctive markers, membrane proteins identified in the  
121 transcriptomic and proteomic profile of the PNT and CB PD-1<sup>+</sup> populations, were confirmed by  
122 flow cytometry: CD3<sup>low</sup> CD8β<sup>low</sup> CCR7<sup>-</sup> and EVI2B<sup>+</sup> (fig. 1E, S1D). As expected, a correlation  
123 between the significantly differentially expressed genes and abundance of the corresponding  
124 proteins was observed (S1E). When zooming in on the genes or proteins that were differentially  
125 expressed between the PD-1<sup>+</sup> and PD-1<sup>-</sup> populations either in PNT or in CB, a highly significant  
126 positive correlation was revealed between the respective PNT and CB populations at both the RNA  
127 and protein level (fig. 1F, S1F, table S1). Supporting this correlation between the PNT and CB  
128 PD-1<sup>+</sup> population, Gene Set Enrichment Analysis (GSEA) confirmed that the significantly

129 upregulated genes in the PNT PD-1<sup>+</sup> population were also significantly enriched in the CB PD-1<sup>+</sup>  
130 population (fig. 1G). Based on the similarities in their transcriptomic and proteomic profile, it is  
131 hypothesized here that the CB CD3<sup>+low</sup> TCRγδ<sup>-</sup> CD4<sup>-</sup> CD8α<sup>+</sup> PD-1<sup>+</sup> population is the progeny of  
132 the PNT PD-1<sup>+</sup> IELps.

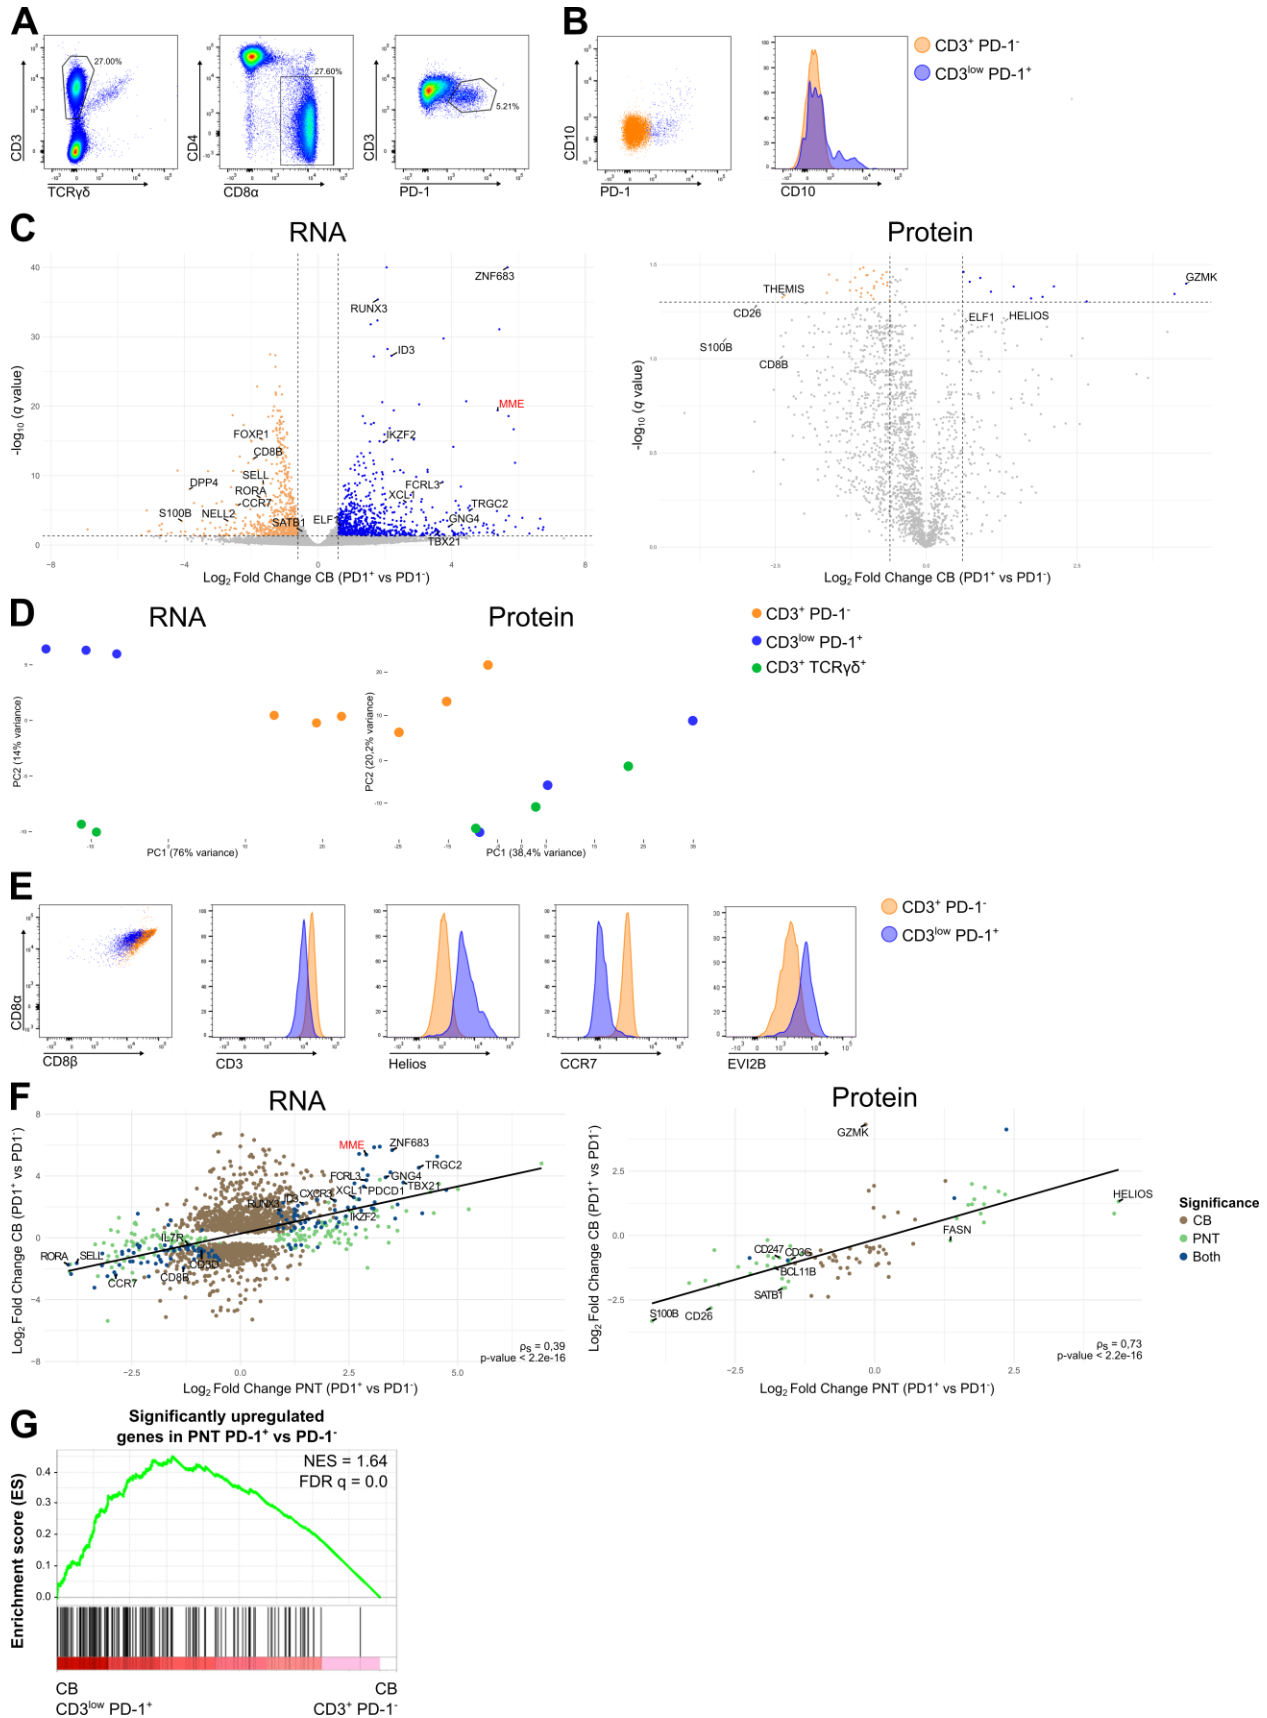

134 **Fig. 1. RNA and protein expression profile by the CB CD3<sup>+low</sup> PD-1<sup>+</sup> population.** (A)  
135 Representative gating strategy for the CD3<sup>+low</sup> TCR $\gamma\delta$ <sup>-</sup> CD4<sup>-</sup> CD8 $\alpha$ <sup>+</sup> PD-1<sup>+</sup> population in  
136 human CB. (B) CD10 expression on the CD3<sup>+</sup> PD-1<sup>-</sup> (orange) and CD3<sup>+low</sup> PD-1<sup>+</sup> (blue)  
137 populations in CB, representative of at least three CBs. (C) Volcano plots of differentially  
138 expressed genes (left) and proteins (right) between the CB CD3<sup>+low</sup> PD-1<sup>+</sup> and CD3<sup>+</sup> PD-  
139 1<sup>-</sup> populations. Triangles indicate data points outside the y-axis range. Data points with a  
140 |Log<sub>2</sub> Fold Change| > 0.6 and adjusted P < 0.05 are colored (upregulated in blue,  
141 downregulated in orange). (D) PCA of the transcriptome (left, donor corrected) and  
142 proteome (right) analysis of the sorted populations from three different CB donors. (E)  
143 Flow cytometric analysis of CD8 $\alpha$ , CD8 $\beta$ , CD3, Helios, CCR7 and EVI2B on the CD3<sup>+</sup>  
144 PD-1<sup>-</sup> and CD3<sup>+low</sup> PD-1<sup>+</sup> populations in CB, representative of at least three CBs. (F)  
145 Scatterplots and Spearman correlation coefficient comparing the Log<sub>2</sub> Fold Change of the  
146 significantly differentially expressed genes (left) and proteins (right) of CB (CD3<sup>+low</sup> PD-  
147 1<sup>+</sup> versus CD3<sup>+</sup> PD-1<sup>-</sup>) and PNT (CD10<sup>+</sup> PD-1<sup>+</sup> versus CD10<sup>-</sup> PD-1<sup>-</sup>). (G) GSEA showing  
148 the significantly upregulated gene set from PNT CD10<sup>+</sup> PD-1<sup>+</sup> versus CD10<sup>-</sup> PD-1<sup>-</sup>, on  
149 the CB CD3<sup>+low</sup> PD-1<sup>+</sup> versus CD3<sup>+</sup> PD-1<sup>-</sup> population. Normalized enrichment score  
150 (NES) and false discovery rate q value (FDR q) are shown.

#### 151 **The TCR repertoires of the PNT PD-1<sup>+</sup> IELp and CB PD-1<sup>+</sup> populations share highly characteristic** 152 **features**

153 TCR $\alpha$  rearrangements are known to occur in a non-random manner, starting at the J-proximal V  
154 segments and the V-proximal J segments. As multiple sequential rearrangements may occur during  
155 the DP thymocyte stage, later rearrangements tend to be biased towards J-distal V segment and V-  
156 distal J segment usage. As shown in our previous publication and confirmed by others, the TCR $\alpha$   
157 usage of PNT PD-1<sup>+</sup> IELp population is biased towards early rearrangements similar to early DP  
158 thymocytes, in contrast to late DP and conventional thymocytes<sup>12,13,15</sup>. Additionally, an  
159 association between autoreactive populations (T<sub>reg</sub> and IELp) and CDR3 amino acidic (AA)  
160 residue content, including the presence of cysteines within 2 positions of the CDR3 apex (cysteine  
161 index) and enrichment of hydrophobic AA doublets at positions 6 and 7 of the CDR3 (hydrophobic  
162 index), is reported<sup>13,20</sup>. Similar CDR3 properties are also reported to result in strong TCR-ligand  
163 interactions<sup>21-23</sup>. Finally, in contrast to NKT or MAIT cells, the repertoire of PNT IELps was  
164 determined to be polyclonal (fig. S2A-B). Thus, to obtain additional evidence for a precursor-  
165 progeny relationship between the PNT and CB PD-1<sup>+</sup> populations, the TCR repertoire of the CB  
166 PD-1<sup>+</sup> population was analyzed for these characteristics and compared to the PNT PD-1<sup>+</sup> TCR  
167 repertoire (fig. S2A-F for PNT).

168 Analysis of the CDR3 $\alpha$  and CDR3 $\beta$  clonotypes revealed that the CB PD-1<sup>+</sup> population was  
169 polyclonal and the degree of polyclonality was similar to the conventional PD-1<sup>-</sup> T cell population  
170 (fig. 2A). This was quantified by calculating the D75 values, i.e. the percentage of unique  
171 clonotypes required to occupy 75% of the total TCR repertoire, for both populations. The D75  
172 values were about 30% for both CB populations, indicating that the bulk of the repertoire consists  
173 of a wide variety of clonotypes. Moreover, no significant mean difference between the two CB  
174 populations could be identified, supporting the notion that the unconventional T cell population  
175 was equally polyclonal as the conventional T cell population in CB (fig. 2B). The CB PD-1<sup>+</sup>  
176 population exhibited biased usage of early J-proximal TCR V $\alpha$  rearrangements and early V-  
177 proximal TCR J $\alpha$  rearrangements, and this bias was similar to that found in the PNT PD-1<sup>+</sup> IELps  
178 (fig. 2C-E, S2D-E). The cysteine index of the TCR $\beta$  chain was significantly higher in the CB PD-

179 1<sup>+</sup> population compared to the PD-1<sup>-</sup> population and the same trend could be observed for the  
180 TCR $\alpha$  chain (fig. 2F). The hydrophobic index of the TCR $\beta$  chain was likewise significantly higher  
181 in the CB PD-1<sup>+</sup> population compared to the PD-1<sup>-</sup> population. However, such a trend could not  
182 be established for the TCR $\alpha$  chain (fig. 2G). In line with this, the CDR3 $\beta$  repertoire exhibited  
183 higher interaction strength values (strength and volume parameters) compared to the PD-1<sup>-</sup>  
184 population counterpart (fig. 2H)<sup>21,22</sup>. In contrast, polarity, a property associated with conventional  
185 T cells, was reduced in the CB PD-1<sup>+</sup> population (fig. 2H)<sup>24</sup>. Finally, TCR sequencing of the CB  
186 populations revealed a significant higher percentage of TRAJ sequences using the T Cell Receptor  
187 Delta Variable 1 (*TRDVI*) gene segment (instead of a TRAV gene segment) in the CB PD-1<sup>+</sup>  
188 population (fig. 2I). When subsequently analyzing the PNT populations, an increased *TRDVI*  
189 usage was also observed in the PNT PD-1<sup>+</sup> IELps compared to their PD-1<sup>-</sup> counterparts (fig. S2H).  
190 V $\delta$ 1<sup>+</sup> cells expressing a hybrid TRDVI-TRAJ-TRAC TCR chain and co-expressing a TCR $\beta$  chain  
191 rather than a TCR $\gamma$  chain have been previously reported in human peripheral blood. This  
192 population, termed  $\delta/\alpha\beta$  T cells, recognizes antigens presented by both human leukocyte antigen  
193 (HLA) and CD1d<sup>25</sup>. By using an anti-V $\delta$ 1 antibody, an enrichment of V $\delta$ 1 membrane expression  
194 was shown in the CB PD-1<sup>+</sup> population (fig. 2J, S2I).

195 To conclude, a series of characteristic features of the TCR repertoire of the PNT PD-1<sup>+</sup> IELp can  
196 be tracked within the CB PD-1<sup>+</sup> population. This strongly suggests that the CB PD-1<sup>+</sup> T cell  
197 population is the progeny of the PNT PD-1<sup>+</sup> T cell population and that biased TCR $\alpha$  chain usage  
198 and self-reactive features of both TCR chains are acquired during early thymic agonist selection  
199 and preserved after thymic egress.

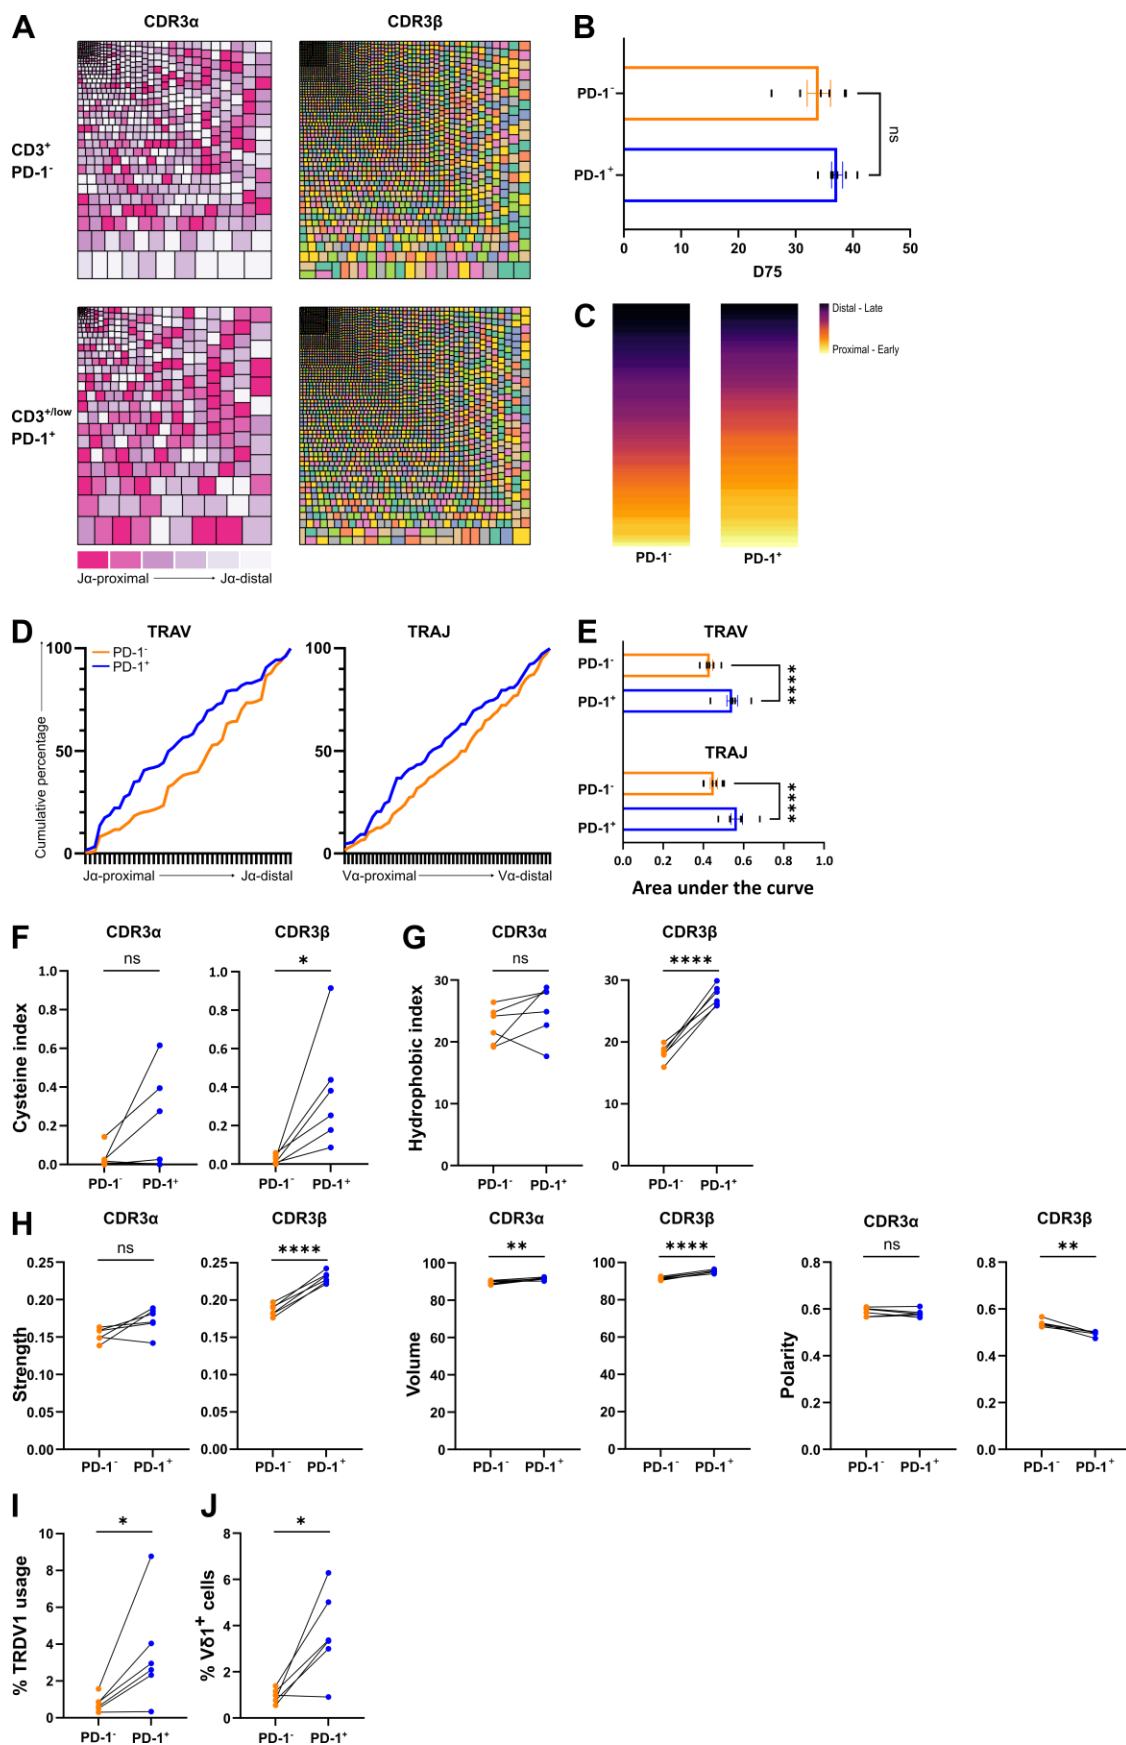



201 **Fig. 2. Distinctive TCR repertoire of the CB PD-1<sup>+</sup> population.** (A) Representative tree maps  
202 showing CDR3 $\alpha$  (left) and CDR3 $\beta$  (right) clonotype usage in relation to repertoire size for  
203 the CD3<sup>+</sup> PD-1<sup>-</sup> (top) and CD3<sup>+/<sub>low</sub></sup> PD-1<sup>+</sup> (bottom) populations. Each rectangle represents  
204 one CDR3 clonotype and its size corresponds to its relative frequency in the repertoire.  
205 Rectangle colors for CDR3 $\alpha$  are categorized from J-proximal (pink) to J-distal (white) for  
206 the TRAV gene segments and for CDR3 $\beta$  are chosen randomly. (B) D75 (percentage of  
207 clonotypes required to occupy 75% of the total TCR repertoire) analysis comparing the  
208 PD-1<sup>-</sup> and PD-1<sup>+</sup> population (individual values and mean  $\pm$  SEM). Mean difference was  
209 not significant. (C) Representative heatmap illustrating the difference in J-proximal versus  
210 J-distal TCR V $\alpha$  usage between the PD-1<sup>-</sup> and PD-1<sup>+</sup> populations. (D) Cumulative  
211 percentage of TRAV (left) or TRAJ (right) gene segment usage by the PD-1<sup>-</sup> (orange) and  
212 PD-1<sup>+</sup> (blue) population in a representative donor. X-axis represents the location in the  
213 TRAV or TRAJ locus. (E) Area under the curve determined from the cumulative plots  
214 from each sample (individual values and mean  $\pm$  SEM). Šídák's multiple comparisons test  
215 was used to assess the statistically significant difference. p-value < 0.0001 (\*\*\*\*). (F)  
216 Cystein index (percentage of unique sequences with cysteine within 2 positions of the  
217 CDR3 apex) and (G) Hydrophobic index (percentage of unique sequences with self-  
218 reactive hydrophobic CDR3 position 6 and 7 doublets) of the CDR3 $\alpha$  (left) and CDR3 $\beta$   
219 (right). (H). Physicochemical properties (strength, volume and polarity) of the CDR3 $\alpha$   
220 (left) and CDR3 $\beta$  (right). (I) Percentage of unique sequences containing a *TRDVI* segment.  
221 (J) Flow cytometric analysis of the percentage of V $\delta$ 1<sup>+</sup> (A13 clone) cells in both CB  
222 populations. (B, F-I) Paired t-tests were used to assess statistical significance. Connected  
223 values correspond to paired populations of the same biological replicate (n= 6). p-value >  
224 0.05 (ns), p-value < 0.05 (\*), p-value < 0.0001 (\*\*\*\*).

### 225 **The CB unconventional T cell population extends beyond the CD3<sup>+/<sub>low</sub></sup> PD-1<sup>+</sup> cells**

226 Because murine IELps were shown to downregulate PD-1 expression during differentiation and  
227 PD-1<sup>-</sup> (T-bet<sup>+</sup>) IELp populations were described<sup>26,27</sup>, the unconventional CD3<sup>+/<sub>low</sub></sup> PD-1<sup>+</sup> CB  
228 population may not include the complete human uIEL population, but only the more recent thymic  
229 emigrants of that population. Therefore, the discriminatory markers identified above were used in  
230 a flow cytometric analysis of the entire CD3<sup>+/<sub>low</sub></sup> TCR $\gamma\delta$ <sup>-</sup> CD4<sup>-</sup> CD8 $\alpha$ <sup>+</sup> fraction in CB (fig. 3A). In  
231 addition to the expected conventional CCR7<sup>+</sup> population, the resulting uniform manifold  
232 approximation and projection (UMAP) revealed a distinct cluster of CCR7<sup>-</sup> cells that contained all  
233 PD-1<sup>+</sup> cells (fig. 3A). Within this CCR7<sup>-</sup> cluster, the majority of the PD-1<sup>-</sup> cells were Helios<sup>+</sup> and  
234 EVI2B<sup>+</sup>, two markers associated with the IELp population (fig. S1C). Here, it was hypothesized  
235 that these Helios<sup>+</sup> and EVI2B<sup>+</sup> cells may contain PD-1<sup>-</sup> uIELs. Consequently, the CB uIEL  
236 population was further studied within the CCR7<sup>-</sup> EVI2B<sup>+</sup> as well as within the CD3<sup>+/<sub>low</sub></sup> PD-1<sup>+</sup>  
237 population.

238 To comprehensively study the heterogeneity of the uIELs in CB, single-cell RNA sequencing  
239 (scRNA-seq) was performed. CB of two different donors was depleted of the CD4<sup>+</sup>, CD14<sup>+</sup>, CD19<sup>+</sup>  
240 and CD235<sup>+</sup> cells (fig. 3B). Of the first donor, the uIELs were sorted as CD8 $\alpha$ <sup>+</sup> CD3<sup>+/<sub>low</sub></sup> PD-1<sup>+</sup>  
241 (sort 1) or CD8 $\alpha$ <sup>+</sup> CCR7<sup>-</sup> EVI2B<sup>+</sup> (sort 2) within the CD3<sup>+/<sub>low</sub></sup> TCR $\gamma\delta$ <sup>-</sup> CD4<sup>-</sup> window. Both fractions  
242 were labeled with different hashtags before they were further processed, enabling subsequent  
243 assignment of the single cells to their corresponding sorting strategy. For the second donor, the  
244 sorting strategy was expanded to include CD4<sup>-</sup> CD8 $\alpha$ <sup>-</sup> DN cells (sort 3 and 4). In sort 3 and 4, the  
245 respective conventional populations were also sorted and added in equal portions before further

246 analysis (fig. 3C). Sort 4 was combined with cellular indexing of transcriptomes and epitopes  
 247 (CITE)-seq to capture expression of 277 membrane proteins. Using a droplet-based single-cell  
 248 platform 3' gene expression libraries were constructed. Reciprocal PCA (RPCA) was used to  
 249 integrate the Seurat objects resulting from the separate sorts. This approach resulted in 24 727 cells  
 250 included in the scRNA-seq analysis after quality control and filtering. Leiden clustering applied to  
 251 this filtered and integrated Seurat object defined 13 distinct clusters (fig. 3D). Both  $CD8\alpha^+$   
 252  $CD3^{+/\text{low}}$   $PD-1^+$  (sort 1) and  $CD8\alpha^+$   $CCR7^-$   $EVI2B^+$  (sort 2) consisted mainly of clusters 1-5,  
 253 suggesting that these clusters represent the unconventional T cells. Focusing on these 5 clusters,  
 254 cluster 1 is relatively overrepresented in the  $CD3^{+/\text{low}}$   $PD-1^+$  sorts 1 and 3 and cluster 4 is relatively  
 255 enriched in the  $CCR7^-$   $EVI2B^+$  sorts 2 and 4, highlighting that indeed the two different sorting  
 256 strategies captured slightly different populations (Fig 3E).

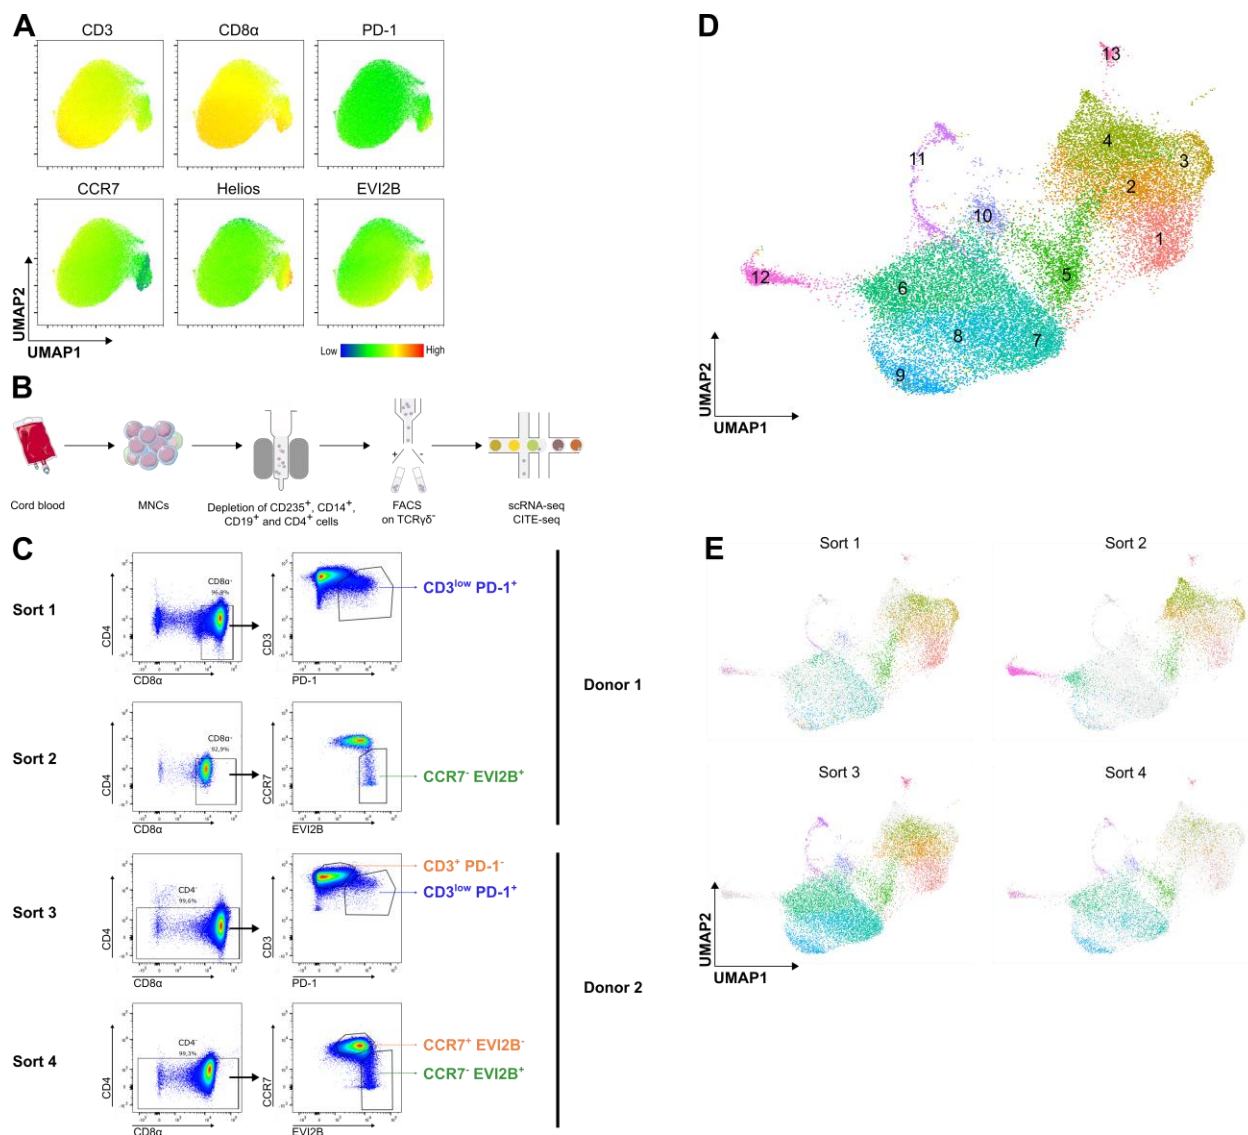

257  
 258 **Fig. 3. Single-cell RNA sequencing of human CB reveals a heterogeneous unconventional**  
 259 **population.** (A) UMAP analysis of flow cytometry data gated on all  $CD3^{+/\text{low}}$   $TCR\gamma\delta^+$   $CD4^+$   
 260  $CD8\alpha^+$  cells from CB. (B) Schematic workflow of the CB processing. (C) Gating strategy

261 on the CD3<sup>+low</sup> TCR $\gamma\delta$ <sup>-</sup> cells for the four different sorts, to isolate the different populations  
262 of interest. (D) UMAP of 24 727 CB single cells, colored by the 13 identified cell clusters.  
263 (E) UMAP representation of the four different sorts, with the cells from the particular sorts  
264 colored according to the cell clusters and the remaining cells in grey.

### 265 **Defining unconventional T cell clusters using transcriptomics**

266 This heterogeneity consisting of 13 different clusters has not been reported before for CB CD8<sup>+</sup> T  
267 cells. Therefore, the clusters were manually annotated based on prominently upregulated genes  
268 (fig. 4A-B; table S2-3). One non-T cell cluster was detected, which was annotated as NK cells  
269 based on high expression of NK-associated genes (*GZMB*, *TYROBP*) and absence of membrane  
270 CD3 and TCR $\alpha\beta$  (fig. 4A, S4A). The NK cluster was assumed to be a contaminant due to lenient  
271 gating for CD3. Two minor T cell clusters were annotated: an NKT/MAIT cluster based on high  
272 *KLRB1* expression and a cycling T cell cluster based on upregulated effector (i.e. *GZMA*, *GZMK*)  
273 and cycling genes (i.e. *PCNA*, *MKI67*, *CDC6*) (fig. 4A, S3A). The NKT/MAIT cells were the main  
274 “contaminant” in the CCR7<sup>-</sup> EVI2B<sup>+</sup> sorts (fig. S3B). Based on their upregulation of hallmark  
275 CD8 $\alpha\alpha$ <sup>+</sup> and IELp T cell genes<sup>8,15</sup>, five unconventional T cell (UTC) clusters were annotated (fig.  
276 4A-B). The unconventional marker genes *TRGC2*, *PDCD1* and *IKZF2* were expressed  
277 homogeneously in these UTC clusters, with some expression in the cycling T and MAIT/NKT  
278 cells (fig. 4C). The remaining clusters were considered conventional T cell (CTC) clusters based  
279 on the expression of typical conventional naive T cell markers (*FOXP1*, *SELL*) (fig. 4A-B).  
280 Furthermore, markers (i.e. *NELL2*, *S100B*) which were strongly overexpressed in the bulk  
281 transcriptome of the conventional PD-1<sup>-</sup> populations in both PNT and CB (fig. 1C, S1C), were  
282 homogeneously expressed in the CTC clusters and largely absent in the UTC clusters, except for  
283 the *GZMK*<sup>+</sup> DN UTC cluster. Likewise, *DPP4* (encoding CD26) was expressed homogeneously  
284 and exclusively by the CTC clusters and strongly in the NKT/MAIT cluster (fig. 4C).

285 Based on the differentially expressed genes, unique distinctive annotations were provided for the  
286 individual UTC clusters (table S3). *MME* and *GPLY* (encoding granulysin) are solely expressed  
287 by the UTC clusters. *IL32* is highly expressed by IL32<sup>+</sup> UTCs but is also expressed at lower levels  
288 by different CTC and UTC clusters. The cluster that bridges the bulk of the UTCs and the CTCs  
289 had a characteristically high expression of *GZMK* without overexpression of other cytolytic  
290 effector genes and a low expression of *CD8A* and *CD8B*, and was annotated as the *GZMK*<sup>+</sup> DN  
291 UTC cluster (fig. 4D-E).

292 The UTC clusters expressed the typical TFs of the IELp lineage, *ID3*, *ZNF683*, *IKZF2*, *RUNX3*  
293 and *TBX21*, although very limited in the *GZMK*<sup>+</sup> DN UTCs. Importantly, expression of these TFs  
294 was absent in the other T cell clusters (fig. 4F). *ID3*, *ZNF683* and *IKZF2* were expressed highest  
295 in the *MME*<sup>+</sup> UTCs. As expected, the CD3<sup>+low</sup> PD-1<sup>+</sup> population (sort 1 and 3) was enriched for  
296 these *MME*<sup>+</sup> UTCs, the recent thymic emigrants (fig. S3B). The activator protein 1 (AP-1) TFs  
297 (i.e. *FOS*, *JUN*) were constitutively expressed in both the UTC and NKT/MAIT clusters (fig. 4E).  
298 With regard to effector function, low constitutive expression of cytokines (i.e. *TNF* and *IFNG*) and  
299 genes involved in cytolysis (i.e. *GPLY*, granzymes) were observed in the *GPLY*<sup>+</sup> UTCs, IL32<sup>+</sup>  
300 UTCs and *GZMK*<sup>+</sup> DN UTCs (fig. 4D-E). These three clusters were considered effector UTC  
301 clusters. These effector clusters showed expression of multiple NK receptors (i.e. *KLRC2*, *KLRD1*,  
302 *NCR3*, *KIRs*). *EOMES*, which is reported to be absent in murine uIELs, was weakly expressed in  
303 the effector clusters. Finally, UTCs expressed important components of the IL-2, IL-7 and IL-15  
304 receptors, as well as IL-12 and IL-18 receptor components, which are required for inflammation-

305 induced cytokine responses. Expression of the genes discussed above was mostly absent in CTCs  
306 and cycling T cells (fig. 4E).

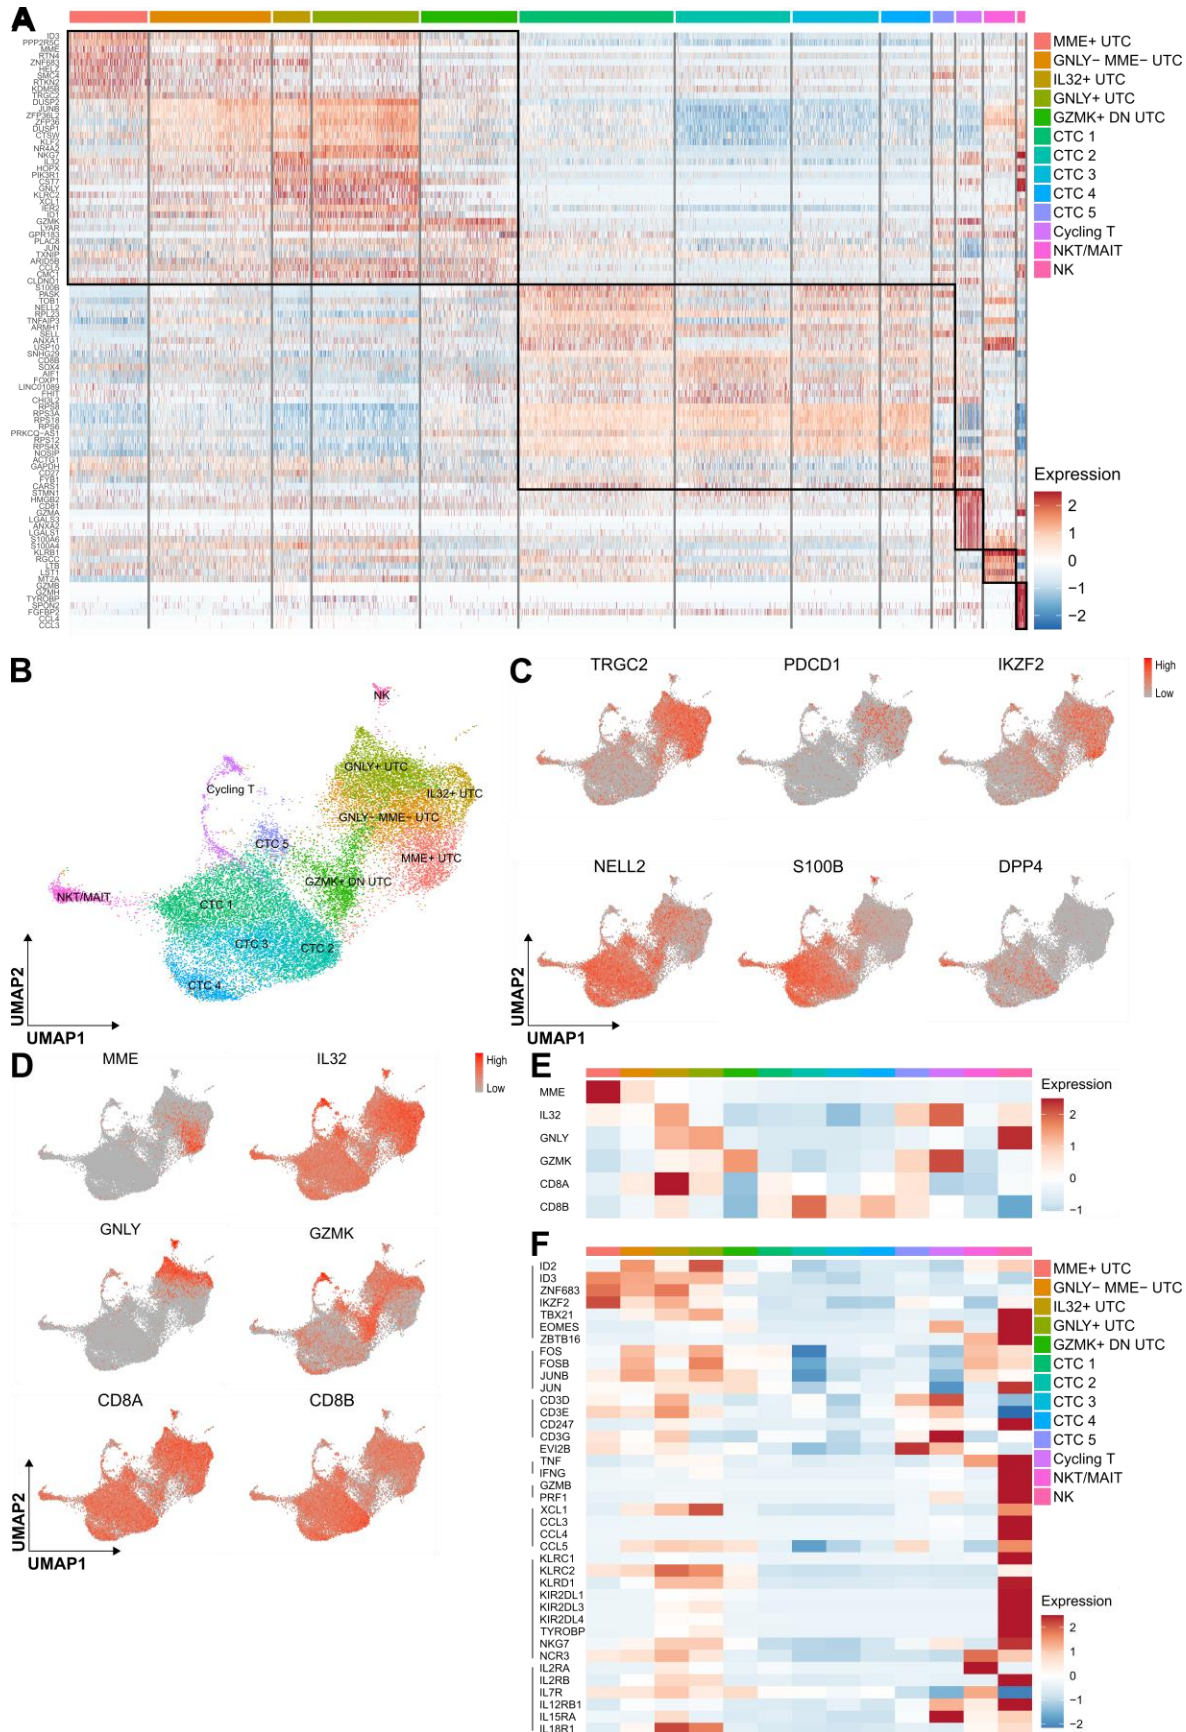

308 **Fig. 4. Annotation of the UTC clusters in CB.** (A) Heatmap showing the expression of the top  
309 10 differentially expressed genes per defined cluster in CB. Recurrent genes are not  
310 repeated. The genes are listed in Table S3. (B) UMAP visualization of the 13 identified  
311 cell clusters in CB. (C) UMAP feature plots representing discriminating genes between the  
312 UTC and CTC clusters. (D) UMAP feature plots representing differentially expressed  
313 genes used to annotate the different UTC clusters. (E) Heatmap showing the mean  
314 expression of the UTC signature genes in the different clusters in CB. (F) Heatmap  
315 showing the mean expression of characteristic UTC genes in the different clusters in CB.

#### 316 **CB UTCs originate from ZNF683<sup>+</sup> CD8 $\alpha$ <sup>+</sup> thymocytes**

317 It was established above that the TCR repertoires of the PNT PD-1<sup>+</sup> IELp and CB PD-1<sup>+</sup>  
318 populations are similar, suggesting that the thymic population is the precursor of the CB uIELs.  
319 To further explore this developmental pathway, the CB scRNA-seq dataset was integrated with a  
320 previously published PNT CD3<sup>+</sup> scRNA-seq dataset<sup>15</sup>, followed by a trajectory analysis. As  
321 published, the CD3<sup>+</sup> DP PNT cells diverged into two main pathways: the unconventional pathway  
322 consisting of GNG4<sup>+</sup> CD8 $\alpha$ (I), ZNF683<sup>+</sup> CD8 $\alpha$ (II) and TCR $\gamma\delta$  cells and the conventional  
323 pathway of CD4<sup>+</sup> and CD8<sup>+</sup> SP T cells (fig. 5A). Integration with the CB populations showed that  
324 the CB UTC clusters partially overlapped with the PNT UTCs, whereas the CB CTC partially  
325 overlapped with the PNT SP T cells (fig. 5A-B). When focusing on the UTC pathway, the CB  
326 MME<sup>+</sup> UTCs overlapped with the PNT CD8 $\alpha$ (I) as well as CD8 $\alpha$ (II) (fig. 5B). Based on the  
327 expression of hallmark differentially expressed genes (i.e. *GNG4*, *MME* and *ZNF683*), the CB  
328 MME<sup>+</sup> UTCs seemed to originate from the PNT ZNF683<sup>+</sup> CD8 $\alpha$ (II) rather than from the GNG4<sup>+</sup>  
329 CD8 $\alpha$ (I) (fig. 5C-D). Therefore, a TSCAN trajectory analysis was performed with the ZNF683<sup>+</sup>  
330 CD8 $\alpha$ (II) as the population of origin. This analysis revealed a common pathway passing through  
331 PNT ZNF683<sup>+</sup> CD8 $\alpha$ (II) and CB MME<sup>+</sup> UTCs, leading to a branching point at the GNLY<sup>-</sup> MME<sup>-</sup>  
332 UTC cluster. The GNLY<sup>-</sup> MME<sup>-</sup> UTC cluster gave rise to three distinct lineages: the GNLY<sup>+</sup> UTCs  
333 (lineage 1), the GZMK<sup>+</sup> DN UTC (lineage 2) and the IL32<sup>+</sup> UTCs (lineage 3)(fig. 8E-F). The  
334 common pathway included ZNF683<sup>+</sup> cells, which upregulated *ID3* and differentiated in *TBX21*(T-  
335 bet) positive cells (fig. 5G-H). During terminal differentiation, all three lineages expressed high  
336 levels of AP-1 TFs and gradually upregulated different effector markers. When analyzing the data  
337 in regulons, the transcriptional regulation of the UTCs and the CTCs was significantly different.  
338 As expected, the CTCs were mainly regulated by the conventional TFs *FOXP1* and *RORA*, while  
339 in the UTCs, *KLF4*, which negatively regulates TCR-mediated proliferation in CD8<sup>+</sup> T cells, and  
340 *RUNX3* were prominent (fig. 5I)<sup>28,29</sup>.

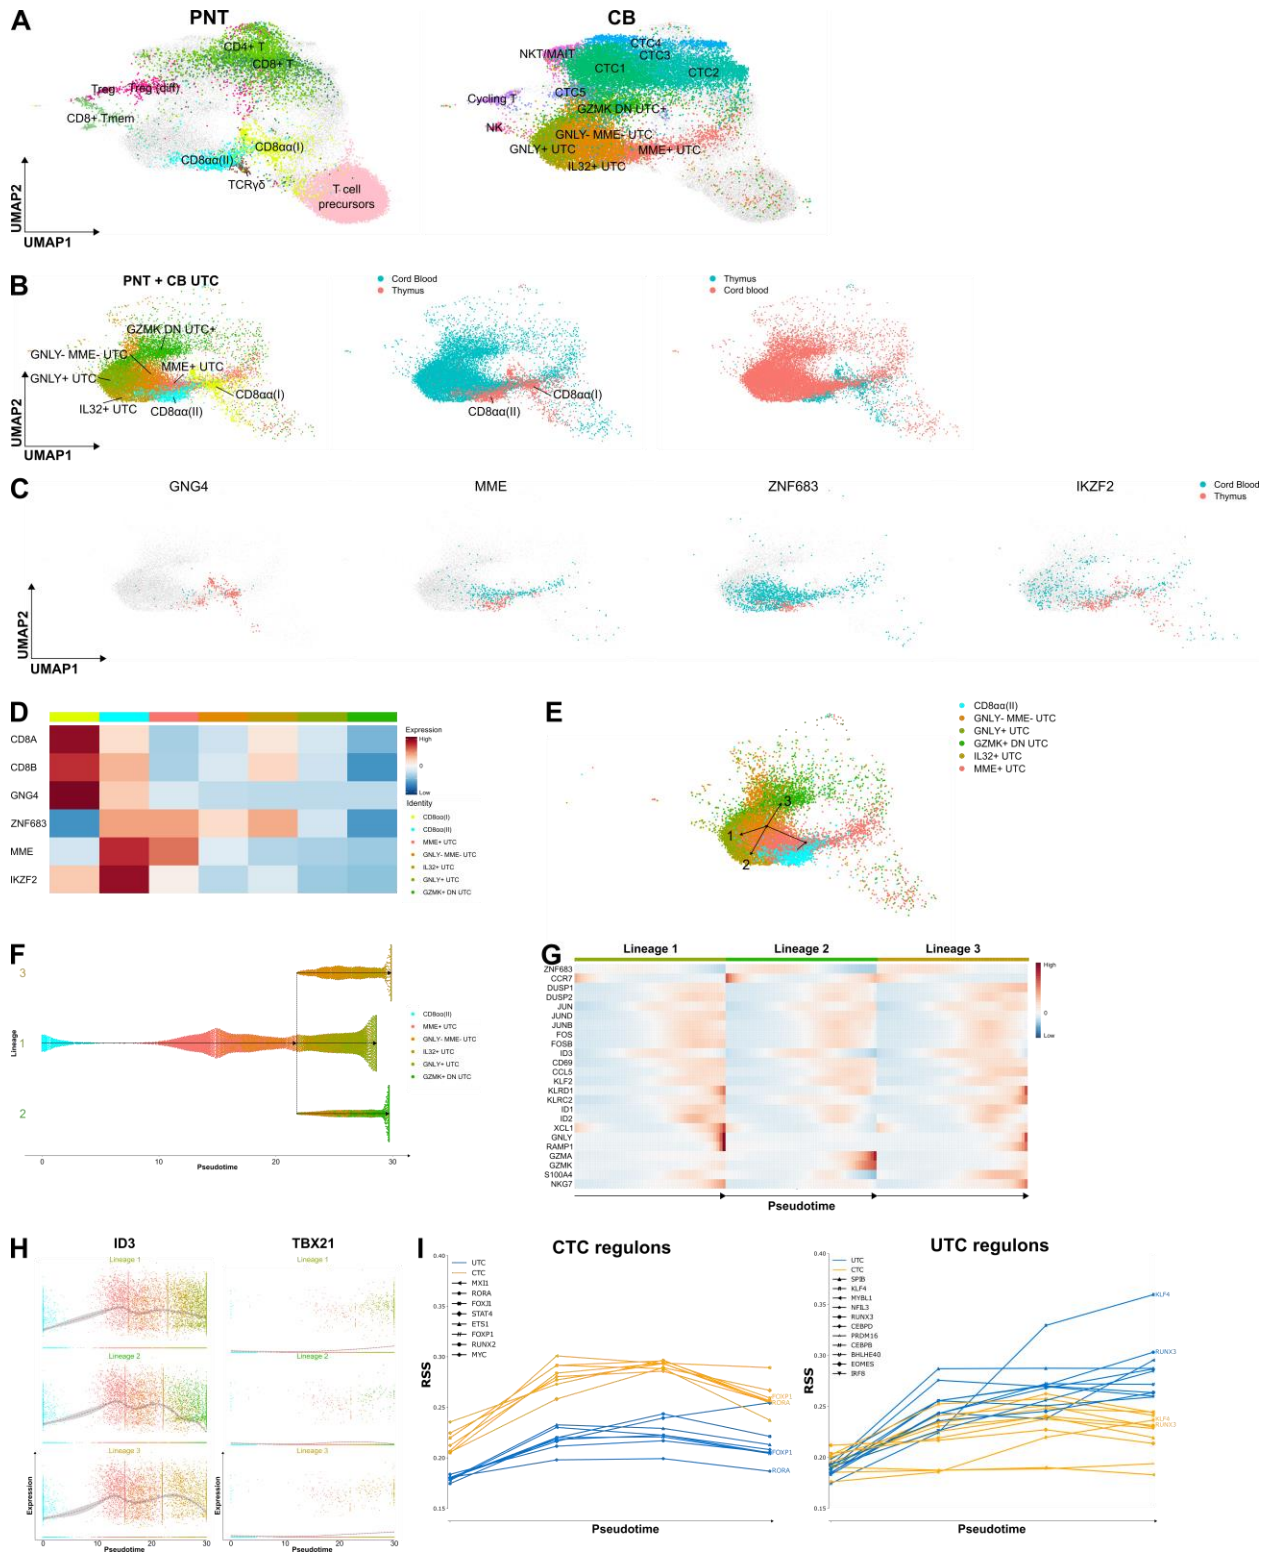

341

342 **Fig. 5. UTC pathway analysis reveals 3 effector lineages** (A) UMAP visualization of the  
 343 annotated PNT clusters (left) and CB clusters (right) after integration. (B) UMAP  
 344 visualization highlighting the PNT and CB UTCs and showing the overlay of the integrated  
 345 UTCs derived from PNT or CB. (C) UMAP visualization *GNG4*, *MME*, *ZNF683* and

346 *IKZF2* expression by UTCs from PNT (red) or CB (blue). Only cells with a relatively high  
347 expression are colored. (D) Heatmap showing the mean expression for hallmark  
348 differentially expressed genes per UTC population. (E) UMAP visualization of the TSCAN  
349 trajectory analysis of the UTC populations with the PNT ZNF683<sup>+</sup> CD8αα(II) as the origin  
350 population. (F) Dendrogram of the predicted UTC lineages. (G) Heatmap showing the  
351 varying gene expression in the pseudotime for the different lineages. (H) For each lineage,  
352 *ID3* or *TBX21* expression is shown per single cell and summarized as the mean (grey line).  
353 (I) The regulon specificity score (RSS) is plotted per cell type for the most prominent UTC  
354 and CTC pathway. The cell populations on the x-axis are ordered according to pseudo-  
355 time.

### 356 **TCRαβ<sup>+</sup> CCR7<sup>-</sup> CD26<sup>-</sup> cells represent the uIEL population in cord blood**

357 To identify phenotypical differences between the different clusters, CITE-seq was included in sort  
358 4 of our scRNA-seq experimental setup (fig. 3C). Membrane protein data were acquired for 3 615  
359 single cells across all clusters (fig. 6A). CD10 (encoded by *MME*) was expressed exclusively in  
360 the *MME*<sup>+</sup> UTC cluster. A small fraction of the *MME*<sup>+</sup> UTC cluster expressed the thymic T cell  
361 immaturity marker CD1a, confirming that this cluster included the recent thymic emigrants.  
362 Likewise, PD-1 was expressed by the immature UTCs, as well as by the cycling T cells. In contrast,  
363 CD26 (*DPP4*) was strongly expressed by the CTCs and NKT/MAIT cells. The latter also highly  
364 expressed CD161 (*KLRB1*), similar to the NK cells. CD54 (*ICAM-1*) and CD244 (*2B4*) are known  
365 to be induced in many immune cell types during inflammatory responses<sup>30,31</sup>. CD54 and CD244  
366 were highly expressed by the effector type UTCs, but not by the earliest CD1a<sup>+</sup> *MME*<sup>+</sup> cells and  
367 the *GZMK*<sup>+</sup> DN UTC cluster. Expression of NK receptors such as CD158b (*KIR2DL/DL3*),  
368 CD244 and CD94 was mainly observed in the *GNLY*<sup>+</sup> UTC (fig. 6B, S4A, table S4).

369 Because of their scarcity in human CB, the unconventional semi-invariant NKT/MAIT populations  
370 have only been studied to a limited extent. The NKT/MAIT cells are the main non-UTC  
371 “contaminant” in CCR7<sup>-</sup> EVI2B<sup>+</sup> cells (sort 2, fig. 3F). However, they can easily be discriminated  
372 from the UTCs using the markers CD161, CD26, CD117 (*KIT*), CD194 (*CCR4*), CD103 (*ITGAE*)  
373 and CD196 (*CCR6*) (fig. 6C). Our scRNA-seq and CITE-seq data did not incorporate TCR  
374 sequencing. Therefore no further distinction was made between NKT or MAIT cells.

375 Based on these CITE-seq results, the uIEL lineage in CB was redefined to include the effector  
376 UTC clusters. Flow cytometric analysis of the CD3<sup>+</sup> TCRγδ<sup>-</sup> cells of a CD4-depleted CB showed  
377 a distinct CCR7<sup>-</sup> CD26<sup>-</sup> population. The UMAP visualization of this CCR7<sup>-</sup> CD26<sup>-</sup> population  
378 clearly showed a gradient of Helios expression with the CD10<sup>+</sup> cells having the highest expression.  
379 Whereas CD10 stained the immature UTCs, CD54 preferentially stains the effector UTCs. Finally,  
380 Eomes<sup>+</sup> Granzyme K<sup>+</sup> cells are included of which a minority is ultimately CD8α<sup>-</sup>. CD161<sup>+</sup>  
381 NKT/MAIT cells are not included in the CCR7<sup>-</sup>CD26<sup>-</sup> population (fig. 6D).

382 A population of virtual memory T (T<sub>VM</sub>) cells has been documented in mice, expressing TCRs  
383 with a strong binding affinity towards self-antigens. These cells express Eomes in the thymus and  
384 acquire a memory phenotype in the periphery<sup>32-34</sup>. A population of CD8<sup>+</sup> KIR/NKG2A<sup>+</sup> T cells  
385 expressing *EOMES* has been described in CB and is proposed as a putative human analog of the  
386 T<sub>VM</sub> population in mice<sup>35</sup>. As KIR expression in CB T cells could only be observed in the UTC  
387 clusters (fig. 6B), the CD3<sup>+</sup> TCRγδ<sup>-</sup> CD4<sup>-</sup> CCR7<sup>-</sup> CD26<sup>-</sup> population was further assessed for these  
388 markers. Flow cytometric analysis indeed showed that the cells with the highest expression for  
389 KIR or NKG2A expressed Eomes. scRNA-seq analysis clearly indicated that *EOMES*, *KIR*,



390 *KLRC1* (encoding NKG2A) and *IL2RB* (encoding CD122) were, besides in the NK cluster, almost  
 391 exclusively present in the UTC clusters and mainly enriched in the GNL<sup>Y</sup><sup>-</sup> UTC cluster (fig. S4B).  
 392 No separate cluster of T cells expressing these markers could be observed, suggesting that these  
 393 T<sub>VM</sub> cells are part of the uIEL population in human CB.

394 Finally, the size of the CD3<sup>+</sup> TCR $\gamma\delta$ <sup>-</sup> CD4<sup>-</sup> CCR7<sup>-</sup> CD26<sup>-</sup> population expressed as percentage of  
 395 the CD3<sup>+</sup> CD4<sup>-</sup> T cells was determined (fig. 6F, S4C). Although the percentages in the different  
 396 donors varied substantially, the uIEL population is generally significantly larger than the TCR $\gamma\delta$ <sup>+</sup>  
 397 or CD161<sup>high</sup> NKT/MAIT population in CB. It constitutes the largest unconventional T cell  
 398 population in CB.

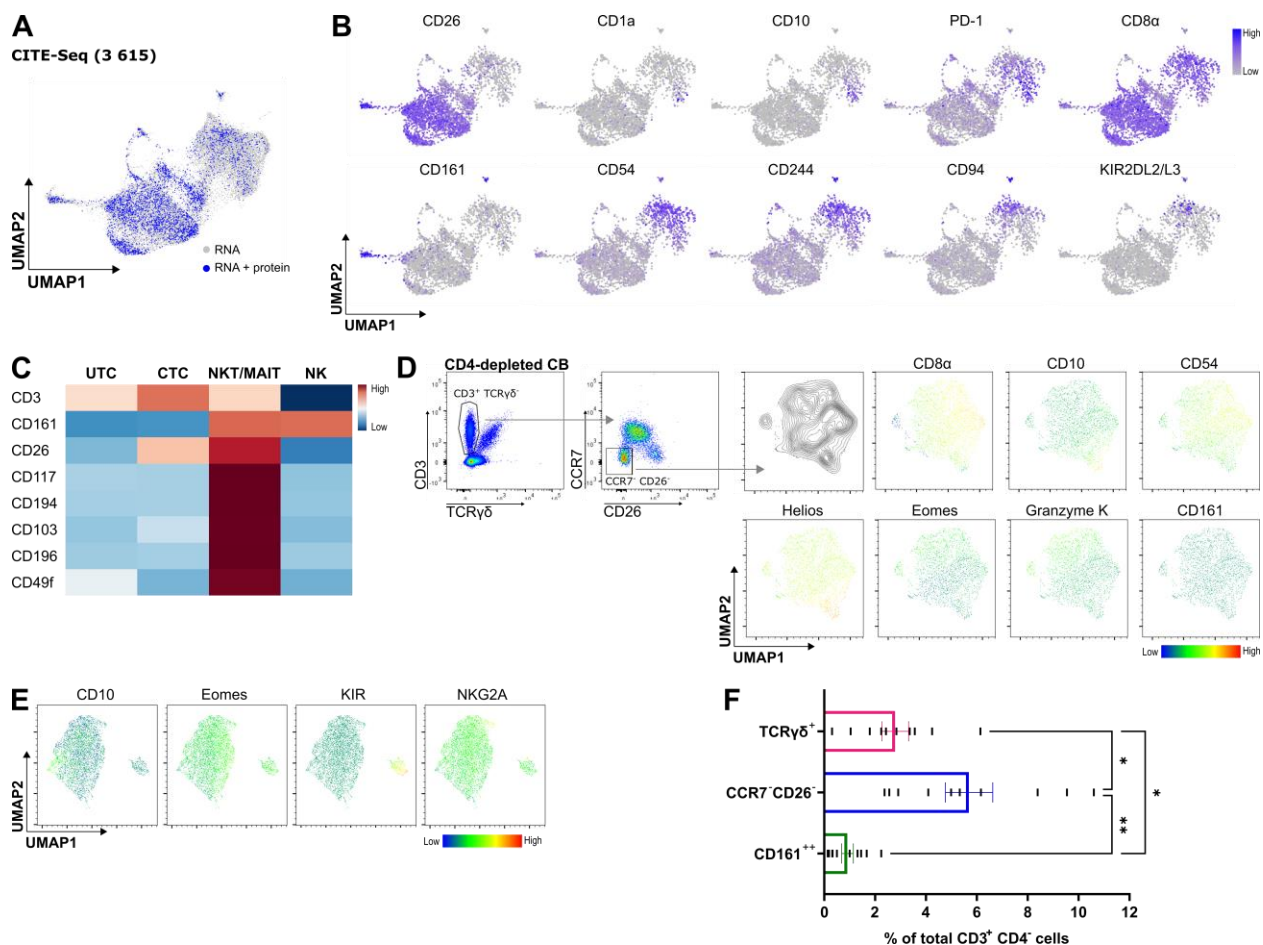

399  
 400 **Fig. 6. CCR7<sup>-</sup> CD26<sup>-</sup> constitutes the largest unconventional population in CB.** (A) UMAP  
 401 visualization of the single cells in the scRNA-seq analysis from which RNA data (grey)  
 402 or combined RNA and protein data (blue) was determined. (B) Protein-based UMAP  
 403 visualizations showing the expression of the indicated cell surface protein markers, only  
 404 visualizing the single cells from which protein data was collected. (C) Heatmap depicting  
 405 the mean expression of cell surface protein markers used to differentiate the UTC and  
 406 CTC clusters from the NKT/MAIT and NK clusters. (D) Representative flow cytometric  
 407 analysis of a CD4-depleted CB. The CD3<sup>+</sup>/<sup>low</sup> TCR $\gamma\delta$ <sup>-</sup> cells were further gated for CCR7<sup>-</sup>  
 408 CD26<sup>-</sup> cells, for which UMAP visualizations are shown. (E) Representative flow  
 409 cytometric analysis of CD10, Eomes, KIR (KIR2DL1/DS1, KIR2DL2/DL3 and  
 410 KIR3DL/DS1) and NKG2A expression on the CD3<sup>+</sup>/<sup>low</sup> TCR $\gamma\delta$ <sup>-</sup> CD4<sup>-</sup> CCR7<sup>-</sup> CD26<sup>-</sup>

411 population in CB, for which UMAP visualizations are shown. (F) Percentage of the CD3<sup>+</sup>  
412 CD4<sup>-</sup> cells in CB which are TCRγδ<sup>+</sup>, CCR7<sup>-</sup> CD26<sup>-</sup> or CD161<sup>high</sup> (individual values and  
413 mean ± SEM, n = 10). Holm-Šídák's multiple comparisons test was used to assess the  
414 statistically significant difference. p-value < 0.05 (\*), p-value < 0.01 (\*\*).

#### 415 **Downregulation of CD8β is a unique characteristic of the CCR7<sup>-</sup> CD26<sup>-</sup> population**

416 Many characteristic markers of the uIELs (i.e. PD-1, Helios) are related to activation by  
417 autoantigens in the thymus. Therefore, the stability and specificity of these hallmarks was tested  
418 during culture-expansion. Both CB populations were culture-expanded with interleukins only, as  
419 an *in vitro* equivalent for steady state persistence of the cells in tissues. To include the entire  
420 population, the CTCs were isolated from CD4-depleted CBs as CD3<sup>+</sup> TCRγδ<sup>-</sup> CD8α<sup>+</sup> CCR7<sup>+</sup> and  
421 the UTCs as CD3<sup>+</sup> TCRγδ<sup>-</sup> CCR7<sup>-</sup> CD26<sup>-</sup>. Similar to the PNT PD-1<sup>+</sup> population, the CB UTCs  
422 extensively proliferated in the presence of interleukin-15 (IL-15)(fig. S5A-B)<sup>36</sup>. CD26 expression  
423 was upregulated by the UTCs in culture, while Helios proved to be a stable distinguishing feature  
424 between the CTCs and UTCs, even after proliferation (fig. 7A, fig. S5C). CD158b  
425 (KIR2DL2/DL3) was expressed on a minority of the IELs and this expression remained stable  
426 during culture. Moreover, no expression could be observed on IL-7 culture-expanded CTCs (fig.  
427 7A, S5D-E). This suggested that all KIR<sup>+</sup> T cells detected *in vivo* belong to the UTC lineage. CD8β  
428 expression decreased on UTCs during culture. whereas expression on CTCs was stable (fig. 7B).

429 To investigate the long-term stability of the CB phenotype, single cell clones of both lineages were  
430 culture-expanded and the phenotype of the resulting clones was analyzed. CD8α<sup>+</sup> and DN clones  
431 were frequently observed in UTC-derived clones, whereas CTC-derived clones remained  
432 predominantly CD8αβ<sup>+</sup> (fig. 7C-D). This confirms that downregulation of CD8(β), and therefore  
433 the expression of CD8αα homodimers, is an exclusive characteristic of UTCs. Although Helios  
434 was induced in CTC-derived clones, expression remained significantly higher in UTC-derived  
435 clones. Similarly, CD26 expression was induced on UTC-derived clones, but remained  
436 significantly higher in CTC-derived clones (fig. 7E). In conclusion, the markers CD26, Helios,  
437 CD8α, CD8β and KIR reliably discriminated between UTCs and CTCs, even after culture  
438 expansion and activation.

439 Functional testing of the CD3<sup>+</sup> TCRγδ<sup>-</sup> CCR7<sup>-</sup> CD26<sup>-</sup> population revealed *ex vivo* CD3-induced  
440 killing activity. Upon activation, a spectrum of chemokines including IL-8, MIP-1α (CCL3), MIP-  
441 1β (CCL4) and fractalkine (CX3CL1) and the cytokines IL-2, FLT-3L, PDGF-AA, GM-CSF, IL-  
442 10, IFN-γ and TNFα was produced (fig. S5F-H).

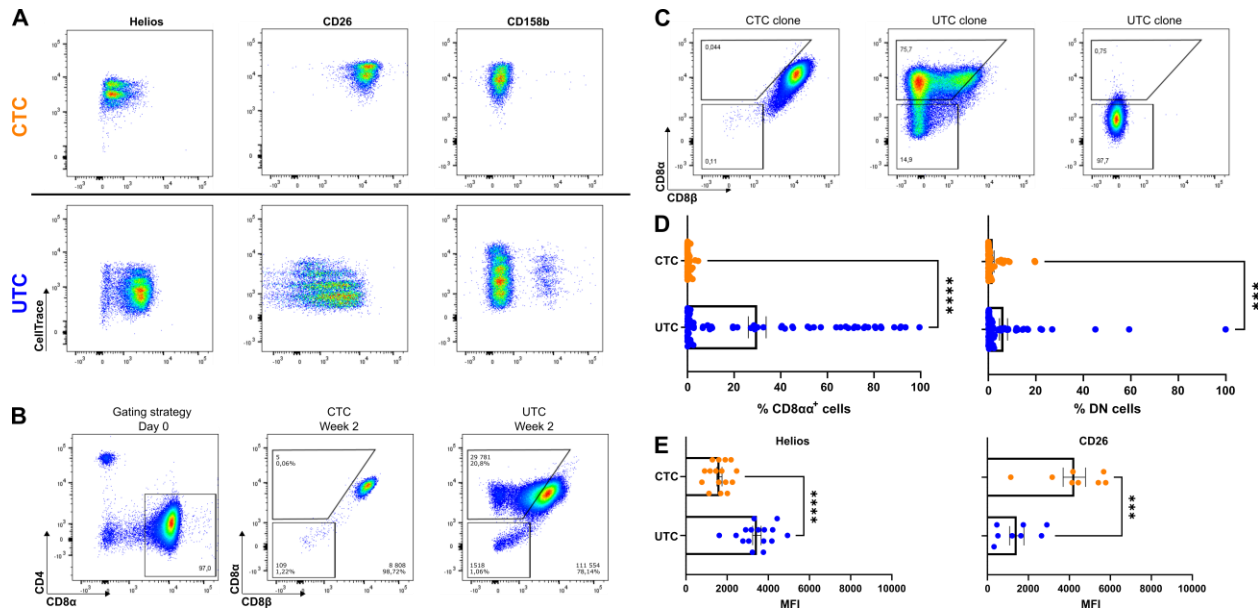

443

444 **Fig. 7. Stable phenotypic uIEL markers following proliferation.** (A) Representative dot plots  
 445 of flow cytometric markers expressed by the CTCs after 5 days of incubation with IL-7 (10  
 446 ng/mL, upper row) and by the UTCs after incubation with IL-15 (10 ng/mL, bottom row).  
 447 Proliferation assessed by CellTrace Violet dye dilution. (B) Both the CTCs and UTCs were  
 448 sorted as strictly CD4<sup>-</sup> CD8α<sup>+</sup> (left). Representative assessment of CD8α and CD8β  
 449 expression by the CTC and UTC populations after two weeks of proliferation with IL-15.  
 450 (C) Representative examples of CD8α and CD8β expression by CTC and UTC clones. (D)  
 451 Percentage of CD8α<sup>+</sup> or DN cells (gated as shown in figure 7C) in CTC or UTC clones  
 452 after at least 2 weeks of expansion. Individual values and mean ± SEM of 60 clones per  
 453 population are shown. Mann-Whitney was used to assess statistical significance. (E) Mean  
 454 fluorescence intensity (MFI) of Helios and CD26 expression by CTC or UTC clones.  
 455 Individual values and mean ± SEM of 8 or 16 clones per population are shown. Unpaired  
 456 t-tests were used to assess statistical significance. p-value < 0.001 (\*\*\*), p-value < 0.0001  
 457 (\*\*\*\*).

## 458 DISCUSSION

459 In the present study, the peripheral progeny of the human thymic IELs was identified in CB as a  
 460 separate population evidently distinct from conventional CD8<sup>+</sup> T cells and from NKT/MAIT cells.  
 461 This population was remarkably heterogeneous. Five clusters were identified of which the MME<sup>+</sup>  
 462 UTCs and the GNLY<sup>-</sup> MME<sup>-</sup> UTCs are the closest related progeny of the thymic CD10<sup>+</sup> PD-1<sup>+</sup>  
 463 population and are themselves the precursor clusters of the three differentiated clusters. It is  
 464 therefore possible that in adulthood, when the output of the thymus diminishes, these two precursor  
 465 populations gradually differentiate into effector cells and are no longer detectable in the blood and  
 466 tissues. Of the effector clusters, the GNLY<sup>+</sup> UTC and IL32<sup>+</sup> UTC both contain cells expressing  
 467 NK receptors including KIRs. KIR<sup>+</sup> cells were not detected in the CTC clusters, *ex vivo* or after  
 468 culture, indicating that KIR expression is confined to the uIEL lineage cells. A fifth UTC cluster,  
 469 adjacent to the CTCs, was notable for high GZMK expression and low expression of CD8A and  
 470 CB8B. A distinctive set of markers to further study this cluster was not found. Although some  
 471 characteristics of the CTCs were present, it was argued that the GZMK<sup>+</sup> DN UTC cluster also  
 472 belongs to the uIEL lineage, because GZMK<sup>+</sup> DN UTCs consistently co-occurred with the UTC

473 population either in the CD3<sup>+/low</sup> PD-1<sup>+</sup> or CCR7<sup>-</sup> EVI2B<sup>+</sup> sorts and constitutively expressed low  
474 levels of CD8 $\alpha$  and CD8 $\beta$ , in contrast to CTCs. Moreover, CD8<sup>+</sup> UTCs have the discriminating  
475 ability to downregulate or lose CD8 $\beta$  (and CD8 $\alpha$ ) expression after *in vitro* stimulation whereas  
476 this was not observed for CD8<sup>+</sup> CTCs.

477 The uIEL lineage in CB was likewise heterogeneous with regard to the expression of hallmark  
478 protein markers such as CD8 $\beta$ , PD-1, Helios and NK receptors. Despite the variable phenotypes  
479 within the uIEL population, evidence is presented that this population is well defined in CB with  
480 the markers CD26 and CCR7: the CCR7<sup>-</sup> fraction of TCR $\alpha\beta$ <sup>+</sup> CD8<sup>+</sup> cells consisted exclusively of  
481 CD26<sup>-</sup> uIELs and CD26<sup>+</sup> NKT/MAIT cells. However, CCR7 and to a lesser extent CD26 and  
482 Helios expression was unstable during T cell activation, which made these markers less valuable  
483 for analysis of samples containing antigen-experienced T cells such as adult blood. Hence, the  
484 presence of KIR<sup>+</sup> T cells, CD8 $\alpha\alpha$ <sup>+</sup> cells and DN T cells (excluding TCR $\gamma\delta$  and NKT/MAIT cells),  
485 other markers that defined subtypes of this lineage and were not affected by T cell activation, was  
486 investigated and validated as a characteristic of the uIELs.

487 It was evidenced in CB that all KIR<sup>+</sup> CD8<sup>+</sup> T cells belong to the uIEL lineage, but only constitute  
488 a small fraction of the total uIEL population. Moreover, as CD8 $\alpha\alpha$ <sup>+</sup> and DN cells could only be  
489 generated from UTCs and not from CTCs, KIR<sup>-</sup> CD8 $\alpha\alpha$ <sup>+</sup> and possibly DN T cells (after exclusion  
490 of TCR $\gamma\delta$ <sup>+</sup>, NKT and MAIT cells) most likely also belong to the uIEL lineage. In addition to their  
491 transcriptional profile, it is therefore suggested that previously described populations, such as  
492 immunosuppressive KIR<sup>+</sup> CD8<sup>+</sup> T cells, KIR/NKG2A<sup>+</sup> CD8<sup>+</sup> T<sub>VM</sub> cells and CD8 $\alpha\alpha$ <sup>+</sup> cells  
493 described in tissues, probably belong to the unconventional, broadly reactive uIEL lineage rather  
494 than to the foreign peptide-reactive conventional CD8<sup>+</sup> T cell lineage<sup>32-35,37</sup>.

495 KIR<sup>+</sup> CD8<sup>+</sup> T cells were recently isolated from human adult blood based on their promiscuous  
496 binding to tetramers of HLA-A3 and HLA-A11. These cells express KLRC2, KIR2DL3 and  
497 NCR3, all of which are expressed by cells within the GNLY<sup>+</sup> UTC and IL32<sup>+</sup> UTC clusters. These  
498 cells are characterized by prominent expression of *IKZF2* and *ZNF683*, two characteristics of the  
499 uIEL lineage<sup>38</sup>. KIR<sup>+</sup> CD8<sup>+</sup> cells, expressing *IKZF2*, are found to be enriched at inflammatory  
500 sites induced by viral infection as well as autoimmune inflammation in patients with celiac disease,  
501 multiple sclerosis and lupus. Importantly, these KIR<sup>+</sup> CD8<sup>+</sup> cells are shown to suppress  
502 autoreactivity by direct killing of pathogenic CD4 T cells<sup>39</sup>. Functionally and phenotypically  
503 similar cells were described earlier in mice as CD8<sup>+</sup> T<sub>reg</sub> cells<sup>40-42</sup>. Here, the uIELs were found to  
504 be able to kill target cells *ex vivo*. Furthermore, uIELs could produce chemokines (i.e. CCL3,  
505 CCL4 and CCL5), demonstrated as a mechanism to attract T cells<sup>43</sup>. It is therefore possible that  
506 uIELs described here, may display *in vivo* immune suppressive properties by killing of autologous,  
507 metabolically active immune blasts. Indeed, it was previously reported that IELps are generated in  
508 the thymus by agonist selection at the early active DP blasts stage<sup>12</sup>. As the IELps lineage is  
509 agonist selected on hematopoietic cells and not on thymic epithelial cells, it would be possible that  
510 IELps specifically react to autoantigens expressed by potent, metabolically active immune blasts  
511<sup>44,45</sup>. Therefore, whereas natural T<sub>reg</sub> cells are reactive to antigens presented in the thymic medulla,  
512 the spectrum of antigens to which the uIELs react is probably presented by early DP blasts in the  
513 thymic cortex.

514 CD8 $\alpha\alpha$ <sup>+</sup> cells have been described in various organs of the human body, including liver and lungs,  
515 and at tumor sites<sup>9,10,46,47</sup>. CD8 $\alpha\alpha$ <sup>+</sup> herpes simplex virus-specific T cells are found at the dermal-  
516 epidermal interface<sup>48</sup>.

517 DN T cells represent a yet poorly characterized subset of TCR $\alpha\beta$ <sup>+</sup> T cells, partially due to their  
518 relatively low frequencies in human peripheral blood. They have mainly been studied in the  
519 context of autoimmunity, where increases of a heterogeneous group of DN T cells have been  
520 reported in patients with systemic lupus erythematosus and other autoimmune diseases. It is shown  
521 in human that peripheral DN T cells are maintained primarily by differentiation from CD8<sup>+</sup> T cells  
522 <sup>49</sup>. It is also reported in mice that only CD8<sup>+</sup> T cells expressing PD-1 and Helios convert to DN T  
523 cells after encountering autoantigens <sup>37</sup>. ScRNA-seq of splenic DN T cells in mice revealed five  
524 DN clusters of which two clusters were characterized by high expression of *IKZF2*, *IL2RB*, NK  
525 receptor genes such as *KLRD1* and chemokines such as *XCL1* and *CCL5*, genes also overexpressed  
526 in the uIEL lineage cells described here <sup>50</sup>. Despite their low frequencies, DN T cells are potent  
527 producers of cytokines and therefore essential for immune responses. The therapeutic potential of  
528 DN T cells as Chimeric antigen receptor (CAR)-T cell is recently explored. It is evidenced that  
529 DN CAR-T cells are as effective as conventional CAR-T cells, without inducing toxicity,  
530 demonstrating the potential of using allogeneic DN T cells <sup>51</sup>. A relationship between these DN T  
531 cells and the uIELs has not yet been conclusively addressed.

532 Finally, T<sub>VM</sub> cells are described in mice as a subtype of CCR7<sup>+</sup> conventional T cells with somewhat  
533 higher affinity for self-ligands in the thymus. The murine T<sub>VM</sub> phenotype is imposed by self-  
534 reactivity of the TCR, similar to IELs. These cells start to express Eomes upon leaving the thymus  
535 and become activated in the periphery, proliferate on IL-15 and home to the tissues <sup>32-34</sup>. The  
536 human counterpart is reported to be KIR/NKG2A<sup>+</sup> Eomes<sup>+</sup> and was detected in adult blood as well  
537 as CB samples <sup>35</sup>. Here, it is reported that indeed a population is present in the UTC clusters in CB  
538 that weakly expresses Eomes and either KIRs or NKG2A.

539 In conclusion, the full spectrum of the uIEL lineage present in human CB is here described. The  
540 more immature uIELs, derived from thymic IELs, differentiate further and generate a  
541 heterogeneous mixture of effector cells. This population includes excellent killers, which may  
542 contribute to immune defence activity as well as exert immune suppressive activity by killing  
543 autologous immune blasts. The concept of these cells originating in the thymus by agonist selection  
544 as a consequence of the special characteristics of their TCR, may throw a different light on the  
545 study of these cells in immune reactivity to pathogens as well as autoimmunity.

## 546 MATERIALS AND METHODS

### 547 Sample Processing

548 Human CB was obtained from the Cord Blood Bank UZ Gent. Samples were used following the  
549 guidelines of the Medical Ethical Committee of Ghent University Hospital (CG20171208A, 8  
550 December 2017) after informed consent had been obtained in accordance with the Declaration of  
551 Helsinki. Mononuclear cells were isolated using density gradient centrifugation (LymphoPrep;  
552 Axis-Shield, 1114547) and were enriched by magnetically activated cell sorting (MACS) through  
553 negative selection using anti-CD4-biotin, anti-CD14-biotin, anti-CD19-biotin, anti-CD235-biotin  
554 (homemade) and anti-biotin Microbeads (Miltenyi Biotec, 130-090-485). Human postnatal thymus  
555 was processed as previously described <sup>36</sup>.

### 556 Flow Cytometry and Antibodies

557 Staining of surface markers was performed in DPBS (Lonza, 17-512F) with 1% fetal calf serum  
558 (FCS; Biowest, S1810) using the antibody to cell ratio recommended by the supplier. Intracellular  
559 and intranuclear stainings were performed following the supplier's protocol using BD

560 Cytotfix&Cytoperm (BD Biosciences, 554714) and the eBioscience™ Foxp3 / Transcription  
561 Factor Staining Buffer Set (eBioscience, 00-5523-00) respectively. Flow cytometric analysis was  
562 performed on the LSR II and cell sorting on the FACSARIA Fusion (both BD Biosciences). Flow  
563 cytometry data were analyzed using FACS DIVA software (BD Biosciences) and FlowJo software  
564 (TreeStar Inc). Viable cells were gated based on propidium iodide (PI) negativity or Fixable  
565 Viability Dye (eFluor 506; Thermo Fisher Scientific, 65-0866-18) negativity for surface and  
566 intracellular stainings respectively. The following list of anti-human monoclonal antibodies was  
567 used. Allophycocyanin (APC)/AF647-conjugated: CD4 (Miltenyi, 130-113-250), CD158b  
568 (KIR2DL2/DL3, Miltenyi, 130-092-617), Helios (Biolegend, 137221), Granzyme K (Biolegend,  
569 370503), NKG2A (CD159a, Miltenyi, 130-114-089), PD-1 (CD279, Biolegend, 367420), TCR $\gamma\delta$   
570 (Miltenyi, 130-113-500); APC Cy7/APC Fire750-conjugated: CD8 $\alpha$  (Biolegend, 344746), CCR7  
571 (CD197, Biolegend, 353246); Brilliant Violet 421-conjugated: CD3 (Biolegend, 317344), CD54  
572 (Biolegend, 353131); Brilliant Violet 605-conjugated: CD161 (Biolegend, 339915); Brilliant  
573 Violet 650-conjugated: CD3 (Biolegend, 317323); Brilliant Violet 711-conjugated: CCR7  
574 (CD197, Biolegend, 353227); Brilliant Violet 785-conjugated: CD10 (Biolegend, 312237);  
575 Fluorescein isothiocyanate (FITC)-conjugated: CD8 $\alpha$  (homemade), CD161 (Miltenyi, 130-114-  
576 118), IFN- $\gamma$  (BD Biosciences, 554551), TCR $\gamma\delta$  (BD Biosciences, 347903); Phycoerythrin (PE)-  
577 conjugated: CD158a/h (KIR2DL1/DS1, Miltenyi, 130-116-975), CD158b1/b2 (KIR2DL2/DL3,  
578 Beckman Coulter, IM2278U), CD158e1/e2 (KIR3DL/DS1, Beckman Coulter, IM3292), EVI2B  
579 (CD361, Thermo Fisher Scientific, A15806), Granzyme B (eBioscience, 12-8899-42), Granzyme  
580 K (Biolegend, 370511), PD-1 (CD279, Biolegend, 367404), Perforin (eBioscience, 12-9994-42);  
581 PE Cy7-conjugated: CD8 $\beta$  (eBioscience, 25-5273-42), CD10 (Biolegend, 312214), Eomes  
582 (eBioscience, 25-4877-41), TCR $\gamma\delta$  (Biolegend, 331222); Peridinin chlorophyll protein complex  
583 (PerCP) Cy5.5-conjugated: CD4 (Biolegend, 344608), CD26 (Biolegend, 302715). CB MNCs  
584 were stained with V $\delta$ 1 (clone A13 supernatant, which can bind to V $\delta$ 1 when incorporated in hybrid  
585 V $\delta$ 1-J $\alpha$ -C $\alpha$  TCR chains, a kind gift from Prof. Dr. Lorenzo Moretta's laboratory), anti-mouse Ig  
586 light chain  $\kappa$  (Biolegend, 409506), 5% normal mouse serum (Invitrogen, 10410), followed by the  
587 appropriate antibodies above to isolate the populations.

588 CD4/CD14/CD19/CD235-depleted CB MNCs were sorted into CD3<sup>+</sup> TCR $\gamma\delta$ <sup>-</sup> CD4<sup>-</sup> CD8 $\alpha$ <sup>+</sup> PD-1<sup>-</sup>  
589 (PD-1<sup>-</sup> population) and CD3<sup>+/low</sup> TCR $\gamma\delta$ <sup>-</sup> CD4<sup>-</sup> CD8 $\alpha$ <sup>+</sup> PD-1<sup>+</sup> (PD-1<sup>+</sup> population) for the  
590 transcriptome, TCR and proteome analyses. The PNT populations were sorted as previously  
591 described<sup>36</sup>. For the single cell assay, CD4/CD14/CD19/CD235-depleted CB MNCs were sorted  
592 into CD3<sup>+/low</sup> TCR $\gamma\delta$ <sup>-</sup> CD4<sup>-</sup> CD8 $\alpha$ <sup>+</sup> PD-1<sup>+</sup> (sort 1), CD3<sup>+/low</sup> TCR $\gamma\delta$ <sup>-</sup> CD4<sup>-</sup> CD8 $\alpha$ <sup>+</sup> CCR7<sup>-</sup> EVI2B<sup>+</sup>  
593 (sort 2), CD3<sup>+</sup> TCR $\gamma\delta$ <sup>-</sup> CD4<sup>-</sup> PD-1<sup>-</sup> and CD3<sup>+/low</sup> TCR $\gamma\delta$ <sup>-</sup> CD4<sup>-</sup> PD-1<sup>+</sup> (sort 3), CD3<sup>+</sup> TCR $\gamma\delta$ <sup>-</sup> CD4<sup>-</sup>  
594 CCR7<sup>+</sup> EVI2B<sup>-</sup> and CD3<sup>+/low</sup> TCR $\gamma\delta$ <sup>-</sup> CD4<sup>-</sup> CCR7<sup>-</sup> EVI2B<sup>+</sup> (sort 4). For the proliferation and  
595 stimulation experiments, CD4/CD14/CD19/CD235-depleted CB MNCs were sorted into CD3<sup>+</sup>  
596 TCR $\gamma\delta$ <sup>-</sup> CD4<sup>-</sup> CD8 $\alpha$ <sup>+</sup> CCR7<sup>+</sup> (CTC) and CD3<sup>+/low</sup> TCR $\gamma\delta$ <sup>-</sup> CD4<sup>-</sup> CCR7<sup>-</sup> CD26<sup>-</sup> (UTC).

## 597 RNA Sequencing

598 The populations of interest were each time sorted from three CB and PNT donors. The CD3<sup>+</sup>  
599 TCR $\gamma\delta$ <sup>+</sup> population was also sorted, only 2 TCR $\gamma\delta$ <sup>+</sup> samples were analyzed for CB. The PNT and  
600 CB populations were sorted in IMDM (Thermo Fisher Scientific, 12440053) supplemented with  
601 10% FCS, 2 mM L-glutamine (Thermo Fisher Scientific, 25030-081), 100 IU/mL penicillin and  
602 100 IU/mL streptomycin (Thermo Fisher Scientific, 15140-122) (complete IMDM, cIMDM) and  
603 washed 3 times in phosphate-buffered saline (PBS). RNA extraction was performed using the  
604 miRNeasy Mini Kit (Qiagen, 217004). For poly(A) RNA-seq, the QuantSeq 3' mRNA FWD kit

605 (Lexogen) was used, followed by single-ended sequencing on the NextSeq500 Sequencing System  
606 (Illumina) with a read length of 75bp. RNA-seq reads were aligned to hg38-noalt using STAR  
607 v2.6.0c and quantified on Ensembl v93.

### 608 **TCR sequencing**

609 For the TCR analysis, the populations of interest were sorted from six CB donors and two new  
610 PNT donors. Previously published PNT samples were also reanalyzed (12). RNA extraction was  
611 performed using the miRNeasy Micro Kit (Qiagen, 217084), followed by template-switch  
612 anchored RT-PCR. High-throughput sequencing of TRA and TRB loci was performed as  
613 previously described<sup>52</sup>. Raw sequencing reads from fastq files were aligned to reference V, D and  
614 J genes from GenBank database specifically for 'TRA' or 'TRB' to build CDR3 sequences using  
615 the MiXCR software version 3.0.12<sup>53</sup>. Following, the CDR3 sequences were analysed using  
616 VDJtools software version 1.2.1<sup>54</sup>. Out of frame sequences were excluded from the analysis, as  
617 well as non-functional TRA and TRB segments using *IMGT* (the international ImMunoGeneTics  
618 information system®) annotation. TRDV gene segment-containing sequences were filtered as  
619 well, except for the analysis where the amount of TRDV1 containing sequences was assessed.  
620 Calcbasicstats default function was used to calculate the number of CDR3 N additions. Cumulative  
621 gene segment plots were generated using the output from CalcSegmentUsage function. Tree maps  
622 were generated using the Treemap Package on RStudio, grouping TRAV and TRAJ segments  
623 according to their locus position. D75 repertoire diversity metrics were calculated by measuring  
624 the percentage of clonotypes required to occupy 75% of the total TCR repertoire. Determination  
625 of the CDR3 $\alpha$  and CDR3 $\beta$  apex region and cysteine usage was performed following previously  
626 described indications<sup>14</sup>. Hydrophobic CDR3 $\alpha$  and CDR3 $\beta$  doublet containing sequences were  
627 determined by calculating the percentage of sequences using any of the 175 amino acid doublets  
628 previously identified as promoting self-reactivity<sup>13</sup>. Physicochemical characteristics (strength,  
629 volume and polarity) of the CDR3 $\beta$  were analysed using VDJtools software version 1.2.

### 630 **LC-MS/MS proteomic analysis**

631 *Sample preparation:* The populations of interest were each time sorted from three CB and PNT  
632 donors. Cell pellets ( $\pm 1.10^6$  cells per pellet) were resuspended in lysis buffer (8 M urea; 20 mM  
633 HEPES, pH 8.0). Samples were sonicated by three pulses of 15 s, interspaced by 1 min pauses on  
634 ice at an intensity output of 15 W, and centrifuged for 15 min at 20 000g at room temperature to  
635 remove insoluble components. Proteins were reduced with 5 mM dithiothreitol (DTT) (Sigma-  
636 Aldrich) for 30 min at 55 °C and then alkylated by the addition of 10 mM iodoacetamide (Sigma-  
637 Aldrich) for 15 min at room temperature in the dark. Samples were further diluted with 20 mM  
638 HEPES, pH 8.0, to a final urea concentration of 4 M and proteins were digested with LysC (Wako)  
639 (1/100, w/w) for 4 hours at 37°C. Samples were again diluted to 2 M urea and digested with trypsin  
640 (Promega) (1/100, w/w) overnight at 37°C. The resulting peptide mixture was acidified by addition  
641 of 1% trifluoroacetic acid (TFA). Peptides were then purified on a SampliQ SPE C18 cartridge  
642 (Agilent), vacuum-dried, and kept at -20 °C until measured by LC-MS/MS.

643 *LC-MS/MS Analysis:* Immediately before injection, purified peptides were redissolved in 15  $\mu$ L  
644 loading solvent (0.1% trifluoroacetic acid/water/acetonitrile (0.1:98:2, v/v/v)) and the peptide  
645 concentration was determined by measuring on a Lunatic spectrophotometer (Unchained Labs). 2  
646  $\mu$ g of peptide material of each sample was injected for LC-MS/MS analysis on an Ultimate 3000  
647 RSLC nano-LC (Thermo Fisher Scientific, Bremen, Germany) in-line connected to a Q Exactive  
648 HF mass spectrometer (Thermo Fisher Scientific) equipped with a nanospray flex ion source

649 (Thermo Fisher Scientific). Trapping was performed at 10  $\mu$ L/min for 4 min in loading solvent A  
650 on a 20-mm trapping column (made in-house, 100- $\mu$ m internal diameter, 5- $\mu$ m beads, C18  
651 Reprosil-HD, Dr Maisch, Germany). Peptide separation after trapping was performed on a 200-  
652 cm-long micropillar array column (PharmaFluidics) with C18-encapped functionality. The  
653 Ultimate 3000's column oven was set to 50°C. For proper ionization, a fused silica PicoTip emitter  
654 (10- $\mu$ m inner diameter) (New Objective) was connected to the  $\mu$ PAC outlet union and a grounded  
655 connection was provided to this union. Peptides were eluted by a nonlinear gradient from 1 to 55%  
656 MS solvent B (0.1% FA in water/acetonitrile (2:8, v/v)) over 145 min, starting at a flow rate of  
657 750 nL/min switching to 300 nL/min after 15 min, followed by a 15-min washing phase plateauing  
658 at 99% MS solvent B. Re-equilibration with 99% MS solvent A (0.1% FA in water) was performed  
659 at 300 nL/min for 45 min followed by 5 min at 750 nL/min adding up to a total run length of 210  
660 min. The mass spectrometer was operated in a data-dependent, positive ionization mode,  
661 automatically switching between MS and MS/MS acquisition for the 16 most abundant peaks in  
662 each MS spectrum. The source voltage was 2.2 kV, and the capillary temperature was 275 °C. One  
663 MS1 scan ( $m/z$  375–1,500, AGC target  $3.10^6$  ions, maximum ion injection time 60 ms), acquired  
664 at a resolution of 60,000 (at 200  $m/z$ ), was followed by up to 16 tandem MS scans (resolution  
665 15,000 at 200  $m/z$ ) of the most intense ions fulfilling predefined selection criteria (AGC target  
666  $1.10^5$  ions, maximum ion injection time 80 ms, isolation window 1.5 Da, fixed first mass 145  $m/z$ ,  
667 spectrum data type: centroid, intensity threshold  $1.3 \times 10^4$ , exclusion of unassigned, 1, 7, 8, >8  
668 positively charged precursors, peptide match preferred, exclude isotopes on, dynamic exclusion  
669 time 12 s). The higher-energy collisional dissociation was set to 28% normalized collision energy,  
670 and the polydimethylcyclosiloxane background ion at 445.12003 Da was used for internal  
671 calibration (lock mass).

672 *Data analysis:* Data analysis was performed with MaxQuant (version 1.6.2.6) using the  
673 Andromeda search engine with default search settings including a false discovery rate (FDR) set  
674 at 1% on both the peptide and protein level. Spectra were searched against the human Swiss-Prot  
675 database (from November 2018 with 20 424 entries) separately for PNT and CB T cells. The mass  
676 tolerance for precursor and fragment ions was set to 4.5 and 20 ppm, respectively, during the main  
677 search. Enzyme specificity was set to the C-terminal of arginine and lysine, also allowing cleavage  
678 next to prolines with a maximum of two missed cleavages. Variable modifications were set to  
679 oxidation of methionine residues and acetylation of protein N-termini. Matching between runs was  
680 enabled with a matching time window of 1.5 min and an alignment time window of 20 min. Only  
681 proteins with at least one unique or razor peptide were retained, leading to the identification of  
682 4539 and 3584 proteins for PNT and CB, respectively. Proteins were quantified by the MaxLFQ  
683 algorithm integrated into the MaxQuant software. A minimum ratio count of two unique or razor  
684 peptides was required for quantification. Further data analysis was performed with the Perseus  
685 software (version 1.6.2.1) separately for the PNT and CB data set after uploading the protein  
686 groups file from MaxQuant. Reverse database hits, potential contaminants and proteins that are  
687 only identified by peptides carrying at least one modified amino acid were removed. Replicate  
688 samples were grouped and proteins with less than three valid values in at least one group were  
689 removed, and missing values were imputed from a normal distribution around the detection limit  
690 resulting in 3,001 and 2,024 quantified proteins for PNT and CB, respectively.

### 691 **Gene set enrichment analysis**

692 GSEA was performed using the GSEA software version 4.1.0., a joint project of UC San Diego  
693 (San Diego, CA, USA) and Broad Institute (Cambridge, MA, USA)<sup>55,56</sup>. The GSEAPreranked tool



694 was run using standard parameters and 1000 permutations. The gene set contained the significantly  
695 differentially expressed genes when comparing the CD10<sup>+</sup> PD-1<sup>+</sup> IELp population to the CD10<sup>-</sup>  
696 PD-1<sup>-</sup> cells from human PNT. The gene list was ranked by comparing the PD-1<sup>+</sup> population to the  
697 PD-1<sup>-</sup> cells from human CB, ranked from the upregulated genes (left) to the downregulated genes  
698 (right). The normalized enrichment score (NES) reflects the degree to which the gene set is  
699 overrepresented in the upregulated genes (positive value) or downregulated genes (negative value).  
700 The false discovery rate q value (FDR q) is the estimated probability that a gene set with a given  
701 NES represents a false-positive finding.

## 702 **Single-cell RNA sequencing analysis**

703 *Single cell library preparation and sequencing:* The populations of interest were sorted from  
704 CD4/CD14/CD19/CD235-depleted CB from two different donors. From the first donor, CD3<sup>+/low</sup>  
705 TCRγδ<sup>-</sup> CD4<sup>-</sup> CD8α<sup>+</sup> as CD3<sup>+/low</sup> PD-1<sup>+</sup> (sort 1) or CCR7<sup>-</sup> EVI2B<sup>+</sup> (sort 2) were sorted separately.  
706 Both fractions were labeled with different TotalSeq anti-human Hashtag antibodies (Biolegend)  
707 before being pooled in equal portions and processed together. From the second donor, CD3<sup>+</sup>  
708 TCRγδ<sup>-</sup> CD4<sup>-</sup> PD-1<sup>-</sup> and CD3<sup>+/low</sup> TCRγδ<sup>-</sup> CD4<sup>-</sup> PD-1<sup>+</sup> (sort 3), CD3<sup>+</sup> TCRγδ<sup>-</sup> CD4<sup>-</sup> CCR7<sup>+</sup> EVI2B<sup>-</sup>  
709 and CD3<sup>+/low</sup> TCRγδ<sup>-</sup> CD4<sup>-</sup> CCR7<sup>-</sup> EVI2B<sup>+</sup> (sort 4) were sorted. Considering the smaller  
710 percentage of unconventional T cells, the conventional cells were sorted separately and later added  
711 in equal portions. Sort 4 was combined with CITE-seq labeling. Cells were incubated for 30 min  
712 on ice with 50 μL of staining mix in PBS containing 0.04% BSA, Fc receptor block (PN 422301,  
713 TruStain FcX, BioLegend) and a human cell surface protein antibody panel containing 277 oligo-  
714 conjugated antibodies (TotalSeq-A, BioLegend) including 6 TotalSeq-A isotype controls (table  
715 S4). TotalSeq antibodies were diluted in concentrations as recommended by the manufacturer.  
716 Sorted single-cell suspensions were resuspended at an estimated final concentration of 1200  
717 cells/μl and loaded on a Chromium GemCode Single Cell Instrument (10x Genomics) to generate  
718 single-cell gel beads-in-emulsion (GEM) at the VIB Single Cell Core. The scRNA-Seq libraries  
719 were prepared using the GemCode Single Cell 3' Gel Bead and Library kit, version NextGEM 3.1  
720 (10x Genomics) according to the manufacturer's instructions with the addition of amplification  
721 primers (3nM), 5'CCTTGGCACCCGAGAATT\*C\*C and  
722 5'GTGACTGGAGTTCAGACGTGTGC\*T\*C during cDNA amplification to enrich the  
723 TotalSeq-A cell surface and hashtag protein oligos. Library construction was performed according  
724 to the manufacturer's instructions. Sequencing libraries were loaded on an Illumina NovaSeq flow  
725 cell at VIB Nucleomics core with sequencing settings according to the recommendations of 10x  
726 Genomics, pooled in a 80:25 ratio for the combined 3' gene expression and cell surface protein  
727 libraries, respectively.

728 *Preprocessing of the scRNA-seq and CITE-seq data:* The Cell Ranger pipeline (10x Genomics,  
729 version 3.1.0) was used to perform sample demultiplexing and to generate FASTQ files for read  
730 1, read 2 and the i7 sample index for the gene expression and cell surface protein libraries. Read 2  
731 of the gene expression libraries was mapped to the reference genome (GRCh38.99) using STAR.  
732 The resulting count matrices were subsequently loaded into R for further processing using Seurat  
733 version 4.0.5<sup>57</sup>. Empty and/or damaged cells were removed from the datasets by filtering on the  
734 following three parameters: (i) number of genes per cell (nFeature > 600), (ii) number of UMI  
735 counts per cell (nCount > 1150) and (iii) percentage mitochondrial genes per cell (percent.mt <  
736 15). The remaining cells were normalized with the built-in normalization function from the Seurat  
737 package using the log normalization method and a scale factor of 10000. Highly variable  
738 features/genes were identified with FindVariableFeatures with the selection method set to vst and

739 the nfeatures parameter to 4000. Differential gene expression analysis between cell clusters and  
740 conditions was performed using Wilcoxon Rank Sum test through the Seurat function  
741 “FindMarkers”. P-value adjustment was performed using Bonferroni correction.

742 CITE-seq antibody reads were quantified using the feature-barcoding functionality within the  
743 Seurat package. Antibodies with low expression were filtered out based on inspection of  
744 the feature plots for each antibody. After processing, the CITE-Seq and scRNA-seq data of Sort 4  
745 were merged into the same Seurat object.

746 *Dataset integration and batch correction:* To verify that our different sorting strategies/definitions  
747 of the uIEL in CB included the same or different cell types, a data integration of our three CB  
748 samples was performed using the Seurat package. Therefore, the integration anchor strategy was  
749 followed. Integration anchors were identified following the reciprocal PCA (rPCA) method instead  
750 of the CCA method, due to the speed of the former method and the recommendation of the  
751 developers that rPCA is more conservative and thus better equipped to handle cell populations that  
752 have no matching type between samples. For this integration, integration features were first  
753 selected with the “SelectIntegrationFeatures” function and subsequently the samples were scaled  
754 (“ScaleData”) and a PCA analysis (“RunPCA”) was executed for each sample separately.  
755 Afterwards the integration anchors were identified with the “FindIntegrationAnchors” function.  
756 After integration with the “IntegrateData” function the data was scaled once again and a new PCA  
757 analysis was performed for visualization and data exploration.

758 Subsequently, to identify the progeny of the thymic uIEL lineage in CB a second data integration  
759 was performed with CB and PNT samples. Therefore, four PNT samples (TTA9, TTA10, TTA12  
760 and TTA14) were selected from Park et al.<sup>15</sup>. The FASTQ-files of these four samples were  
761 acquired and processed them as described under ‘Preprocessing of the scRNA-seq and CITE-seq  
762 data’. By processing the samples of both organs in the same way, the variation that needed to be  
763 corrected in the subsequent data integration and batch correction step, could be limited. For the  
764 latter, the R package Harmony was used<sup>58</sup>. Prior to the data integration with Harmony all samples  
765 were merged into a combined Seurat object afterwards the following steps were performed: (i)  
766 identification of highly variable genes/features (“FindVariableFeatures”), (ii) data scaling  
767 (“ScaleData”) and (iii) PCA analysis (“RunPCA”). The data integration was executed with the  
768 function “RunHarmony”, taking into account three sources of potential batch effects, namely  
769 donor, sort and chemistry. The later was added since the PNT samples were processed with the v2  
770 version of the 10X genomics scRNA-seq kit, while for the CB samples the v3 version was used.  
771 Afterwards, the integrated object was processed for visualization and data exploration.

772 *Trajectory Analysis and SCENIC:* Based on the data integration of the PNT and CB samples, a  
773 trajectory analysis could be performed to identify the progeny of the uIELs. For this trajectory  
774 analysis, the TSCAN algorithm (version 1.28.0) was used<sup>59</sup>. To simplify the problem for the  
775 algorithm, the populations of interest were selected prior to the actual analysis. For the  
776 unconventional populations, these selected cell types were: CD8 $\alpha\alpha$ (II), MME<sup>+</sup> UTC, GNLY<sup>-</sup>  
777 MME<sup>-</sup> UTC, GNLY<sup>+</sup> UTC, GZMK<sup>+</sup> DN UTC, and IL32<sup>+</sup> UTC. While for the conventional  
778 populations these were: CD8<sup>+</sup>T, CTC1, CTC2, CTC3, CTC4, and CTC5. The first step in the  
779 TSCAN analysis was the calculation of the centroid of each cluster with the “reducedDim”  
780 function. These centroids were then connected with a minimum spanning tree (MST) in the  
781 subsequent step using the “createClusterMST” function. The cells were subsequently mapped and  
782 ordered along this MST to determine their pseudo-time point. This was done with the functions  
783 “mapCellsToEdges” and “orderCells”. To identify the genes that might play a role in this

784 differentiation process along the pseudo-time, a differential expression analysis with the tradeSeq  
785 package (version 1.4.0) was performed <sup>60</sup>. Therefore, a generalized additive model (GAM) was  
786 fitted to the data along the pseudotime and subsequently the associationTest was performed to  
787 identify the differentially expressed genes.

788 To better identify which transcription factors are important or active in the different cell  
789 populations, the data was analyzed with the SCENIC algorithm <sup>61</sup>. Note that for the actual analysis  
790 the python implementation of this package, pySCENIC, was used. In a first step gene regulatory  
791 networks and co-expression modules are generated by the GRNBoost 2 algorithm based on the  
792 correlation between transcription factors and other genes. Subsequently regulons are predicted  
793 based on known binding motifs provided by the Aerts lab. And in the final step the cellular  
794 enrichment for the different regulons was calculated using the Aucell algorithm. The output of the  
795 different steps was loaded into python to calculate the regulon specificity scores (RSS) for the  
796 different cell populations through the pySCENIC package.

797 The regulon specificity score (RSS) was calculated from the regulon activity score (RAS) and lies  
798 between 0 and 1. With a higher value for RSS indicating a higher specificity of that regulon in the  
799 cell type compared to others. The UTC and CTC specific regulons were selected according to the  
800 following strategy: a regulon that appeared in the top 5 of one of the UTC or CTC populations and  
801 in the top 10 of one or more of the remaining UTC or CTC populations was selected for inclusion  
802 in the plot. The RAS was calculated based on the rank of the expression value in the cell of all  
803 genes involved in the regulon <sup>62</sup>.

#### 804 **T cell expansion**

805 The CellTrace proliferation assays were performed as previously described <sup>36</sup>. CTC and UTC  
806 clones were generated by FACS sorting single cells and expanding them on irradiated allogenic  
807 feeder cells, consisting of a mixture of 40 Gy irradiated peripheral blood mononuclear cells and  
808 50 Gy irradiated JY cells. Cells were cultured in cIMDM, supplemented with 1 µg/mL  
809 phytohemagglutinin (PHA, Sigma–Aldrich). IL-2 (5 ng/mL; Miltenyi, 130-097-748) was added  
810 on day five and day ten. Cells were restimulated every 7 to 14 days. After 14-28 days, grown  
811 clones were harvested and assessed via flow cytometry.

#### 812 **<sup>51</sup>Chromium Release Assay**

813 Target cells (W6/32 or OKT3 hybridoma) were labelled with <sup>51</sup>Chromium (Perkin Elmer) for 90  
814 min at 37 °C, washed and added at 10<sup>3</sup> cells per well to various ratios of effector T cells (CTC or  
815 UTC population after overnight incubation with IL-15) in 96 well V-bottomed plates (NUNC,  
816 Thermo Fisher Scientific). After 4 hours of co-incubation, the supernatant was harvested and  
817 measured in a 1450 LSC & Luminescence Counter (Perkin Elmer). Specific lysis was calculated  
818 as follows: (experimental release–spontaneous release)/(maximal release–spontaneous release) ×  
819 100%.

#### 820 **Cytokine Production**

821 To explore the secreted cytokine profile of the CB populations, Luminex High Performance  
822 Assays (R&D Systems) were performed. The supernatant of both freshly sorted UTCs and UTC-  
823 derived clones after 24 hours of stimulation with phorbol myristate acetate (PMA, 1 ng/mL;  
824 Sigma-Aldrich, 16561-29-8) + ionomycin (0.5 µg/mL; Sigma-Aldrich, 56092-82-1) was assessed  
825 with the Luminex Performance Human XL Cytokine Magnetic Panel 44-plex Fixed Panel (Bio-  
826 Techne, LKTM014). Following, a custom mixed multiplex was used to determine the IFN-γ,

827 granzyme B, GM-CSF, MIP-1 $\alpha$ , MIP-1 $\beta$  and IL-2 concentrations in the supernatant of both freshly  
828 sorted CTCs and UTCs after 24 hours of stimulation with PMA + ionomycin. All assays were  
829 performed conform the manufacturer's protocol and measured with the Bio-Plex 200 system  
830 (Biorad) and analysed with the Bio-Plex Manager software version 6.2. Levels below or above the  
831 detection level were set as the lower or upper detection level, respectively.

### 832 **Statistical Analysis**

833 Statistical analyses were performed in Prism version 9.3.1. (GraphPad Software, San Diego, CA,  
834 USA), using statistical tests as indicated in figure legends. Results were considered statistically  
835 significant when the p-value was less than 0.05.

### 836 **Data availability**

837 The mass spectrometry proteomics data have been deposited to the ProteomeXchange Consortium  
838 via the PRIDE<sup>63</sup> partner repository with the dataset identifier PXD033392. The sequencing data  
839 discussed in this publication have been deposited in NCBI's Gene Expression Omnibus<sup>64</sup> and will  
840 be made accessible upon publication through GEO Series accession number GSE201811.

### 841 **Supplementary Material:**

842 Fig. S1. RNA and protein expression profile by the PNT CD10<sup>+</sup> PD-1<sup>+</sup> population.

843 Fig. S2. Distinctive TCR repertoire of the PNT CD10<sup>+</sup> PD-1<sup>+</sup> population.

844 Fig. S3. Defining the T cell clusters in CB.

845 Fig. S4. Phenotyping the unconventional populations in CB.

846 Fig. S5. UTC phenotype and functionality after proliferation with IL-15.

847 Table S1. Significantly differentially expressed between the PD-1<sup>+</sup> and PD-1<sup>-</sup> population, in both  
848 PNT and CB

849 Table S2. Cell number in each identified cluster

850 Table S3. Top 10 differentially expressed genes for each identified cluster

851 Table S4. CITE-seq cell surface protein antibody panel

852 Table S5. Luminex Performance Human XL Cytokine Magnetic Panel 44-plex Fixed Panel

853 **Author contributions:** Conceptualization: L. Billiet, L. De Cock, B. Vandekerckhove; Data  
854 curation: L. Billiet, L. De Cock, B. Vandekerckhove; Formal Analysis: L. Billiet, L. De Cock, G.  
855 Sanchez Sanchez, R. L. Mayer, F. Van Nieuwerburgh; Funding acquisition: D. Vermijlen, F.  
856 Impens, B. Menten, B. Vandekerckhove; Investigation: L. Billiet, L. De Cock, G. Sanchez  
857 Sanchez, R. L. Mayer, G. Goetgeluk, N. Vandamme; Methodology: L. Billiet, L. De Cock, B.  
858 Vandekerckhove; Project administration: L. Billiet, B. Vandekerckhove, Software: L. De Cock,  
859 N. Vandamme, R. Seurinck, J. Roels, M. Lavaert; Supervision: G. Leclercq, T. Taghon, F. Impens,  
860 B. Menten, D. Vermijlen, B. Vandekerckhove; Validation: B. Vandekerckhove; Visualization: L.  
861 Billiet, L. De Cock, G. Sanchez Sanchez, R.L. Mayer; Writing – original draft: L. Billiet, B.  
862 Vandekerckhove; Writing – review & editing: L. De Cock, G. Sanchez Sanchez, R. L. Mayer, S.  
863 De Munter, M. Pille, J. Ingels, H. Jansen, K. Weening, E. Pascal, K. Raes, S. Bonte, T. Kerre, N.  
864 Vandamme, R. Seurinck, J. Roels, F. Van Nieuwerburgh, G. Leclercq, T. Taghon, F. Impens, B.  
865 Menten, D. Vermijlen.

866 **Acknowledgments:** This work is funded by Research Foundation Flanders (Fonds voor  
867 Wetenschappelijk Onderzoek—FWO, grant 3F012519), Stichting tegen Kanker (STK, grant FAF-  
868 F/2016/756), GOA (grant 2021.0008), FNRS CDR (grant CDR\_J.0225.20) and the TCR GSS is  
869 supported by Télévie-FNRS (grant 7.4586.19 and 7.6529.21). The authors would like to thank Dr.  
870 Conny Matthys of the Cord Blood Bank UZ Gent, Sergi Rodà Llordés for his help and advice to  
871 optimize data filtering for analysis of the CDR3 sequences, Gabriële Holtappels for her expertise  
872 in Luminex High Performance Assays, Juliette Roels for her tips and tricks regarding R and the  
873 UGent Core Flowcytometrie for their help with flow cytometry and cell sorting. We thank Hilde  
874 Cheroutre, Derk Amsen and Greet Verstichel for critically reading the manuscript and their helpful  
875 suggestions.

876 The authors declare no competing financial interests.

## 877 **References**

- 878 1. Garner, L. C., Klenerman, P. & Provine, N. M. Insights Into Mucosal-Associated  
879 Invariant T Cell Biology From Studies of Invariant Natural Killer T Cells. *Front.*  
880 *Immunol.* **9**, 1478 (2018).
- 881 2. Pellicci, D. G., Koay, H. F. & Berzins, S. P. Thymic development of unconventional T  
882 cells: how NKT cells, MAIT cells and  $\gamma\delta$  T cells emerge. *Nat. Rev. Immunol.* **20**, 756–770  
883 (2020).
- 884 3. McDonald, B. D., Jabri, B. & Bendelac, A. Diverse developmental pathways of intestinal  
885 intraepithelial lymphocytes. *Nat. Rev. Immunol.* **18**, 1–12 (2018).
- 886 4. Yamagata, T., Mathis, D. & Benoist, C. Self-reactivity in thymic double-positive cells  
887 commits cells to a CD8 $\alpha\alpha$  lineage with characteristics of innate immune cells. *Nat.*  
888 *Immunol.* **2004 56 5**, 597–605 (2004).
- 889 5. Mayans, S. *et al.*  $\alpha\beta$ T cell receptors expressed by CD4-CD8 $\alpha\beta$ - intraepithelial T cells  
890 drive their fate into a unique lineage with unusual MHC reactivities. *Immunity* **41**, 207–  
891 218 (2014).
- 892 6. McDonald, B. D., Bunker, J. J., Ishizuka, I. E., Jabri, B. & Bendelac, A. Elevated T cell  
893 receptor signaling identifies a thymic precursor to the TCR $\alpha\beta$ +CD4-CD8 $\beta$ - intraepithelial  
894 lymphocyte lineage. *Immunity* **41**, 219–229 (2014).
- 895 7. McDonald, B. D., Bunker, J. J., Erickson, S. A., Oh-Hora, M. & Bendelac, A.  
896 Crossreactive  $\alpha\beta$  T Cell Receptors Are the Predominant Targets of Thymocyte Negative  
897 Selection. *Immunity* **43**, 859–869 (2015).
- 898 8. Hummel, J. F. *et al.* Single-cell RNA-sequencing identifies the developmental trajectory  
899 of C-Myc-dependent NK1.1<sup>+</sup> T-bet<sup>+</sup> intraepithelial lymphocyte precursors. *Mucosal*  
900 *Immunol.* **13**, 257–270 (2020).
- 901 9. Dadi, S. *et al.* Cancer Immun surveillance by Tissue-Resident Innate Lymphoid Cells and  
902 Innate-like T Cells. *Cell* **164**, 365–377 (2016).
- 903 10. Wu, R. *et al.* Identification and Regulation of TCR $\alpha\beta$ +CD8 $\alpha\alpha$ + Intraepithelial  
904 Lymphocytes in Murine Oral Mucosa. *Front. Immunol.* **11**, 1702 (2020).
- 905 11. Mayassi, T. & Jabri, B. Human intraepithelial lymphocytes. *Mucosal Immunology* vol. 11  
906 1281–1289 (2018).

- 907 12. Verstichel, G. *et al.* The checkpoint for agonist selection precedes conventional selection  
908 in human thymus. *Sci. Immunol.* **2**, (2017).
- 909 13. Daley, S. R. *et al.* Cysteine and hydrophobic residues in CDR3 serve as distinct T-cell  
910 self-reactivity indices. *J. Allergy Clin. Immunol.* **144**, 333–336 (2019).
- 911 14. Wirasinha, R. C. *et al.*  $\alpha\beta$  T-cell receptors with a central CDR3 cysteine are enriched in  
912 CD8 $\alpha\alpha$  intraepithelial lymphocytes and their thymic precursors. *Immunol. Cell Biol.* **96**,  
913 553–561 (2018).
- 914 15. Park, J. E. *et al.* A cell atlas of human thymic development defines T cell repertoire  
915 formation. *Science.* **367**, eaay3224 (2020).
- 916 16. Le, J. *et al.* Single-Cell RNA-Seq Mapping of Human Thymopoiesis Reveals Lineage  
917 Specification Trajectories and a Commitment Spectrum in T Cell Development. *Immunity*  
918 **52**, 1105-1118.e9 (2020).
- 919 17. Kondo, M. *et al.* SATB1 Plays a Critical Role in Establishment of Immune Tolerance. *J.*  
920 *Immunol.* **196**, 563–572 (2016).
- 921 18. Wei, H. *et al.* Cutting Edge: Foxp1 Controls Naive CD8 + T Cell Quiescence by  
922 Simultaneously Repressing Key Pathways in Cellular Metabolism and Cell Cycle  
923 Progression. *J. Immunol.* **196**, 3537–3541 (2016).
- 924 19. Kisielow, J., Tortola, L., Weber, J., Karjalainen, K. & Kopf, M. Evidence for the  
925 divergence of innate and adaptive T-cell precursors before commitment to the  $\alpha\beta$  and  $\gamma\delta$   
926 lineages. *Blood* **118**, 6591–6600 (2011).
- 927 20. Stadinski, B. D. *et al.* Hydrophobic CDR3 residues promote the development of self-  
928 reactive T cells. *Nat. Immunol.* **17**, 946–955 (2016).
- 929 21. Lagattuta, K. A. *et al.* Repertoire analyses reveal T cell antigen receptor sequence features  
930 that influence T cell fate. *Nat. Immunol.* 2022 233 **23**, 446–457 (2022).
- 931 22. Košmrlj, A., Jha, A. K., Huseby, E. S., Kardar, M. & Chakraborty, A. K. How the thymus  
932 designs antigen-specific and self-tolerant T cell receptor sequences. *Proc. Natl. Acad. Sci.*  
933 *U. S. A.* **105**, 16671–16676 (2008).
- 934 23. Logunova, N. N. *et al.* MHC-II alleles shape the CDR3 repertoires of conventional and  
935 regulatory naïve CD4+ T cells. *Proc. Natl. Acad. Sci. U. S. A.* **117**, 13659–13669 (2020).
- 936 24. Monk, J. M. *et al.* Antigen receptor repertoire profiling from RNA-seq data. *Nat.*  
937 *Biotechnol.* 2017 3510 **35**, 908–911 (2017).
- 938 25. Pellicci, D. G. *et al.* The molecular bases of  $\delta/\alpha\beta$  T cell-mediated antigen recognition. *J.*  
939 *Exp. Med.* **211**, 2599–2615 (2014).
- 940 26. Ruscher, R. *et al.* Intestinal CD8 $\alpha\alpha$  IELs derived from two distinct thymic precursors have  
941 staggered ontogeny. *J. Exp. Med.* **217**, (2020).
- 942 27. Kurd, N. S. *et al.* Factors that influence the thymic selection of CD8 $\alpha\alpha$  intraepithelial  
943 lymphocytes. *Mucosal Immunol.* 1–12 (2020) doi:10.1038/s41385-020-0295-5.
- 944 28. Mamonkin, M. *et al.* Differential roles of KLF4 in the development and differentiation of  
945 CD8+ T cells. *Immunol. Lett.* **156**, 94–101 (2013).

- 946 29. Hao, Z. *et al.* K48-linked KLF4 ubiquitination by E3 ligase Mule controls T-cell  
947 proliferation and cell cycle progression. *Nat. Commun.* 2017 81 **8**, 1–14 (2017).
- 948 30. Bui, T. M., Wiesolek, H. L. & Sumagin, R. ICAM-1: A master regulator of cellular  
949 responses in inflammation, injury resolution, and tumorigenesis. *J. Leukoc. Biol.* **108**,  
950 787–799 (2020).
- 951 31. Speiser, D. E. *et al.* The Activatory Receptor 2B4 Is Expressed In Vivo by Human CD8 +  
952 Effector  $\alpha\beta$  T Cells. *J. Immunol.* **167**, 6165–6170 (2001).
- 953 32. Miller, C. H. *et al.* Eomes identifies thymic precursors of self-specific memory-phenotype  
954 CD8+ T cells. *Nat. Immunol.* 2020 215 **21**, 567–577 (2020).
- 955 33. Drobek, A. *et al.* Strong homeostatic TCR signals induce formation of self-tolerant virtual  
956 memory CD8 T cells. *EMBO J.* **37**, e98518 (2018).
- 957 34. White, J. T. *et al.* Virtual memory T cells develop and mediate bystander protective  
958 immunity in an IL-15-dependent manner. *Nat. Commun.* 2016 71 **7**, 1–13 (2016).
- 959 35. Jacomet, F. *et al.* Evidence for eomesodermin-expressing innate-like CD8+  
960 KIR/NKG2A+ T cells in human adults and cord blood samples. *Eur. J. Immunol.* **45**,  
961 1926–1933 (2015).
- 962 36. Billiet, L. *et al.* Human Thymic CD10+ PD-1+ Intraepithelial Lymphocyte Precursors  
963 Acquire Interleukin-15 Responsiveness at the CD1a– CD95+ CD28– CCR7–  
964 Developmental Stage. *Int. J. Mol. Sci.* **21**, (2020).
- 965 37. Rodríguez-Rodríguez, N. *et al.* Programmed Cell Death 1 and Helios Distinguish TCR- $\alpha\beta$   
966 + Double-Negative (CD4 – CD8 –) T Cells That Derive from Self-Reactive CD8 T Cells.  
967 *J. Immunol.* **194**, 4207–4214 (2015).
- 968 38. Schattgen, S. A. *et al.* Integrating T cell receptor sequences and transcriptional profiles by  
969 clonotype neighbor graph analysis (CoNGA). *Nat. Biotechnol.* **40**, 54–63 (2022).
- 970 39. Li, J. *et al.* KIR + CD8 + T cells suppress pathogenic T cells and are active in autoimmune  
971 diseases and COVID-19. *Science (80-. )*. **376**, eabi9591 (2022).
- 972 40. Cantor, H. & Kim, H. J. A new chapter in the CD8 T reg story. *J. Exp. Med.* **218**, (2020).
- 973 41. Kim, H. J. *et al.* Stable inhibitory activity of regulatory T cells requires the transcription  
974 factor Helios. *Science (80-. )*. **350**, 334–339 (2015).
- 975 42. Mishra, S. *et al.* TGF- $\beta$  and Eomes control the homeostasis of CD8+regulatory T cells. *J.*  
976 *Exp. Med.* **218**, (2021).
- 977 43. Patterson, S. J. *et al.* T regulatory cell chemokine production mediates pathogenic T cell  
978 attraction and suppression. *J. Clin. Invest.* **126**, 1039–1051 (2016).
- 979 44. Lee, S. T., Georgiev, H., Breed, E. R., Ruscher, R. & Hogquist, K. A. MHC Class I on  
980 murine hematopoietic APC selects Type A IEL precursors in the thymus. *Eur. J. Immunol.*  
981 **51**, 1080–1088 (2021).
- 982 45. Sullivan, B. A., Kraj, P., Weber, D. A., Ignatowicz, L. & Jensen, P. E. Positive Selection  
983 of a Qa-1-Restricted T Cell Receptor with Specificity for Insulin. *Immunity* **17**, 95–105  
984 (2002).

- 985 46. Sheng, H. *et al.* Distinct PLZF + CD8 $\alpha\alpha$  + Unconventional T Cells Enriched in Liver Use  
986 a Cytotoxic Mechanism to Limit Autoimmunity. *J. Immunol.* **203**, 2150–2162 (2019).
- 987 47. Zhang, Y. Y. *et al.* CD8 $\alpha\alpha$  + T cells exert a pro-inflammatory role in patients with  
988 psoriasis. *Ski. Heal. Dis.* **1**, e64 (2021).
- 989 48. Zhu, J. *et al.* Immune surveillance by CD8 $\alpha\alpha$ + skin-resident T cells in human herpes virus  
990 infection. *Nature* **497**, 494–497 (2013).
- 991 49. Brandt, D. & Hedrich, C. M. TCR $\alpha\beta$  + CD3 + CD4 - CD8 - (double negative) T cells in  
992 autoimmunity. *Autoimmun. Rev.* **17**, 422–430 (2018).
- 993 50. Yang, L. *et al.* Transcriptome landscape of double negative T cells by single-cell RNA  
994 sequencing. *J. Autoimmun.* **121**, 102653 (2021).
- 995 51. Vasic, D. *et al.* Allogeneic double-negative CAR-T cells inhibit tumor growth without off-  
996 tumor toxicities. *Sci. Immunol.* **7**, 3642 (2022).
- 997 52. Van Caeneghem, Y. *et al.* Antigen receptor-redirected T cells derived from hematopoietic  
998 precursor cells lack expression of the endogenous TCR/CD3 receptor and exhibit specific  
999 antitumor capacities. *Oncoimmunology* **6**, e1283460 (2017).
- 1000 53. Bolotin, D. A. *et al.* MiXCR: Software for comprehensive adaptive immunity profiling.  
1001 *Nature Methods* vol. 12 380–381 (2015).
- 1002 54. Shugay, M. *et al.* VDJtools: Unifying Post-analysis of T Cell Receptor Repertoires. *PLoS*  
1003 *Comput. Biol.* **11**, e1004503 (2015).
- 1004 55. Subramanian, A. *et al.* Gene set enrichment analysis: A knowledge-based approach for  
1005 interpreting genome-wide expression profiles. *Proc. Natl. Acad. Sci. U. S. A.* **102**, 15545–  
1006 15550 (2005).
- 1007 56. Mootha, V. K. *et al.* PGC-1 $\alpha$ -responsive genes involved in oxidative phosphorylation are  
1008 coordinately downregulated in human diabetes. *Nat. Genet.* **34**, 267–273 (2003).
- 1009 57. Hao, Y. *et al.* Integrated analysis of multimodal single-cell data. *Cell* **184**, 3573–3587.e29  
1010 (2021).
- 1011 58. Korsunsky, I. *et al.* Fast, sensitive and accurate integration of single-cell data with  
1012 Harmony. *Nat. Methods* **16**, 1289–1296 (2019).
- 1013 59. Ji, Z. & Ji, H. TSCAN: Pseudo-time reconstruction and evaluation in single-cell RNA-seq  
1014 analysis. *Nucleic Acids Res.* **44**, e117 (2016).
- 1015 60. Van den Berge, K. *et al.* Trajectory-based differential expression analysis for single-cell  
1016 sequencing data. *Nat. Commun.* **11**, 1–13 (2020).
- 1017 61. Aibar, S. *et al.* SCENIC: Single-cell regulatory network inference and clustering. *Nat.*  
1018 *Methods* **14**, 1083–1086 (2017).
- 1019 62. Ma, A. *et al.* IRIS3: Integrated cell-type-specific regulon inference server from single-cell  
1020 RNA-Seq. *Nucleic Acids Res.* **48**, W275–W286 (2020).
- 1021 63. Perez-Riverol, Y. *et al.* The PRIDE database resources in 2022: A hub for mass  
1022 spectrometry-based proteomics evidences. *Nucleic Acids Res.* **50**, 543–552 (2022).
- 1023 64. Edgar, R., Domrachev, M. & Lash, A. E. Gene Expression Omnibus: NCBI gene



1024 expression and hybridization array data repository. *Nucleic Acids Res.* **30**, 207–210  
1025 (2002).

1026

1027 **Abbreviations**

1028 CB, cord blood

1029 CTC, conventional T cell

1030 DN, double negative

1031 GSEA, gene set enrichment analysis

1032 IEL, intraepithelial lymphocyte

1033 IELp, intraepithelial lymphocyte precursor

1034 KIR, killer Ig-like receptor

1035 MAIT, mucosal-associated invariant T cell

1036 NKT, natural killer T cell

1037 PNT, postnatal thymus

1038 SP, single positive

1039 TCR, T cell receptor

1040 TF, transcription factor

1041 T<sub>VM</sub>, virtual memory T cell

1042 uIEL, unconventional intraepithelial lymphocyte

1043 UMAP, uniform manifold approximation and projection

1044 UTC, unconventional T cell

1045
